# Supplementary material for: The Antitumoral Effect In Ovo of a New Inclusion Complex from Dimethoxycurcumin with Magnesium and Beta-Cyclodextrin
Source: MDPI journal article supplement (doi:10.3390/ijms25084380), 2024-04-16
Supplement: s1 [file s1]

# The Antitumoral Effect In Ovo of a New Inclusion Complex from Dimethoxycurcumin with Magnesium and Beta-Cyclodextrin

Marco A. Obregón-Mendoza <sup>1,†</sup>, William Meza-Morales <sup>1,†</sup>, Karla Daniela Rodríguez-Hernández <sup>1</sup>, M. Mirian Estévez-Carmona <sup>2</sup>, Leidys L. Pérez-González <sup>1</sup>, Rosario Tavera-Hernández <sup>1</sup>, María Teresa Ramírez-Apan <sup>1</sup>, David Barrera-Hernández <sup>3</sup>, Mitzi García-Olivares <sup>3</sup>, Brian Monroy-Torres <sup>1</sup>, Antonio Nieto-Camacho <sup>1</sup>, María Isabel Chávez <sup>1</sup>, Rubén Sánchez-Obregón <sup>1</sup> and Raúl G. Enríquez <sup>1,\*</sup>

<sup>1</sup> Instituto de Química, Universidad Nacional Autónoma de México, Mexico City 04510, Mexico; marco.obregon@zaragoza.unam.mx (M.A.O.-M.); william.meza@upr.edu (W.M.-M.); xandy411@comunidad.unam.mx (K.D.R.-H.); leidyslaura92@gmail.com (L.L.P.-G.); rosario.tavera@gmail.com (R.T.-H.); mtrapan@yahoo.com.mx (M.T.R.-A.); brianuami@gmail.com (B.M.-T.); camanico2015@yahoo.com (A.N.-C.); isabel@unam.mx (M.I.C.); rubens@unam.mx (R.S.-O.)

<sup>2</sup> Departamento de Farmacia, Escuela Nacional de Ciencias Biológicas, Instituto Politécnico Nacional, M. Wilfrido Massieu SN, U. A. Zacatenco, Mexico City 07738, Mexico; mirianestevezc@gmail.com

<sup>3</sup> Departamento de Biología de la Reproducción “Dr. Carlos Gual Castro”, Instituto Nacional de Ciencias Médicas y Nutrición Salvador Zubirán, México, Mexico City 14080, Mexico; barrera1912@gmail.com (D.B.-H.); mariol\_48@ciencias.unam.mx (M.G.-O.)

\* Correspondence: habib@unam.mx or enriquezhabib@gmail.com; Tel.: +52-55562-24404

† These authors contributed equally to this work.

## Index

|                                                                                                                                                     |    |
|-----------------------------------------------------------------------------------------------------------------------------------------------------|----|
| <b>Fig S1.</b> <sup>1</sup> H NMR spectrum of Dimethoxycurcumin-BF <sub>2</sub> ( DiMeOC-BF <sub>2</sub> , 400 MHz, DMSO- <i>d</i> <sub>6</sub> ).  | 3  |
| <b>Fig S2.</b> <sup>13</sup> C NMR spectrum of Dimethoxycurcumin-BF <sub>2</sub> ( DiMeOC-BF <sub>2</sub> , 100 MHz, DMSO- <i>d</i> <sub>6</sub> ). | 4  |
| <b>Fig S3.</b> IR Spectrum of DiMeOC-BF <sub>2</sub> .                                                                                              | 5  |
| <b>Fig S4.</b> Mass Spectrum of DiMeOC-BF <sub>2</sub> (IE <sup>+</sup> ).                                                                          | 6  |
| <b>Fig S5.</b> <sup>1</sup> H NMR spectrum of DiMeOC (400 MHz, DMSO- <i>d</i> <sub>6</sub> ).                                                       | 7  |
| <b>Fig S6.</b> <sup>13</sup> C NMR spectrum of DiMeOC (100 MHz, DMSO- <i>d</i> <sub>6</sub> ).                                                      | 8  |
| <b>Fig S7.</b> UV-VIS spectrum in methanol of DiMeOC.                                                                                               | 9  |
| <b>Fig S8.</b> HPLC spectrum of DiMeOC (417nm, CH <sub>3</sub> CN/H <sub>2</sub> O (0.02% formic acid) 55:45).                                      | 10 |
| <b>Fig S9.</b> Mass Spectrum of DiMeOC (DART <sup>+</sup> ).                                                                                        | 11 |
| <b>Fig S10.</b> <sup>1</sup> H NMR spectrum of DiMeOC-Mg (400 MHz, DMSO- <i>d</i> <sub>6</sub> ).                                                   | 12 |
| <b>Fig S11.</b> <sup>13</sup> C NMR spectrum of DiMeOC-Mg (100 MHz, DMSO- <i>d</i> <sub>6</sub> ).                                                  | 13 |
| <b>Fig S12.</b> HSQC NMR spectrum of DiMeOC-Mg (400 MHz, DMSO- <i>d</i> <sub>6</sub> ).                                                             | 14 |
| <b>Fig S13.</b> HMBC NMR spectrum of DiMeOC-Mg (400 MHz, DMSO- <i>d</i> <sub>6</sub> ).                                                             | 15 |
| <b>Fig S14.</b> IR Spectrum of DiMeOC-Mg.                                                                                                           | 16 |
| <b>Fig S15.</b> UV-VIS spectrum in methanol of DiMeOC-Mg .                                                                                          | 17 |
| <b>Fig S16.</b> HPLC spectrum of DiMeOC-Mg (417 nm, CH <sub>3</sub> CN/H <sub>2</sub> O (0.02% formic acid) 55:45).                                 | 18 |
| <b>Fig S17.</b> Mass Spectrum of DiMeOC-Mg (MALDI-TOF).                                                                                             | 19 |
| <b>Fig S18.</b> <sup>1</sup> H NMR spectrum of DiMeOC-Mg-BCD (400 MHz, DMSO- <i>d</i> <sub>6</sub> ).                                               | 20 |
| <b>Fig S19.</b> <sup>13</sup> C NMR spectrum of DiMeOC-Mg-BCD (100 MHz, DMSO- <i>d</i> <sub>6</sub> ).                                              | 21 |
| <b>Fig S20.</b> HSQC NMR spectrum of DiMeOC-Mg-BCD (400 MHz, DMSO- <i>d</i> <sub>6</sub> ).                                                         | 22 |
| <b>Fig S21.</b> HMBC NMR spectrum of DiMeOC-Mg-BCD (400 MHz, DMSO- <i>d</i> <sub>6</sub> ).                                                         | 23 |
| <b>Fig S22.</b> IR Spectrum of DiMeOC-Mg-BCD.                                                                                                       | 24 |
| <b>Fig S23.</b> UV-VIS spectrum in methanol of DiMeOC-Mg-BCD .                                                                                      | 25 |
| <b>Fig S24.</b> HPLC spectrum of DiMeOC-Mg-BCD (417nm, CH <sub>3</sub> CN/H <sub>2</sub> O (0.02% formic acid) 55:45).                              | 26 |
| <b>Fig S25.</b> Mass Spectrum of DiMeOC-Mg-BCD (ESI).                                                                                               | 27 |
| <b>Fig S26.</b> Standard curve of DiMeOC-Mg (415nm, 1-Octanol).                                                                                     | 28 |
| <b>Fig S27.</b> Inclusion ratio DiMeOC-Mg and BCD (PBS media).                                                                                      | 29 |
| <b>Fig S28.</b> <sup>1</sup> H NMR spectrum of Beta-cyclodextrin (BCD, 400 MHz, DMSO- <i>d</i> <sub>6</sub> ).                                      | 30 |
| <b>Fig S29.</b> <sup>13</sup> C NMR spectrum of BCD (100 MHz, DMSO- <i>d</i> <sub>6</sub> ).                                                        | 31 |
| <b>Fig S30.</b> HSQC NMR spectrum of BCD (500 MHz, DMSO- <i>d</i> <sub>6</sub> ).                                                                   | 32 |
| <b>Fig S31.</b> HMBC NMR spectrum of BCD (500 MHz, DMSO- <i>d</i> <sub>6</sub> ).                                                                   | 33 |
| <b>Fig S32.</b> IR Spectrum of BCD.                                                                                                                 | 34 |

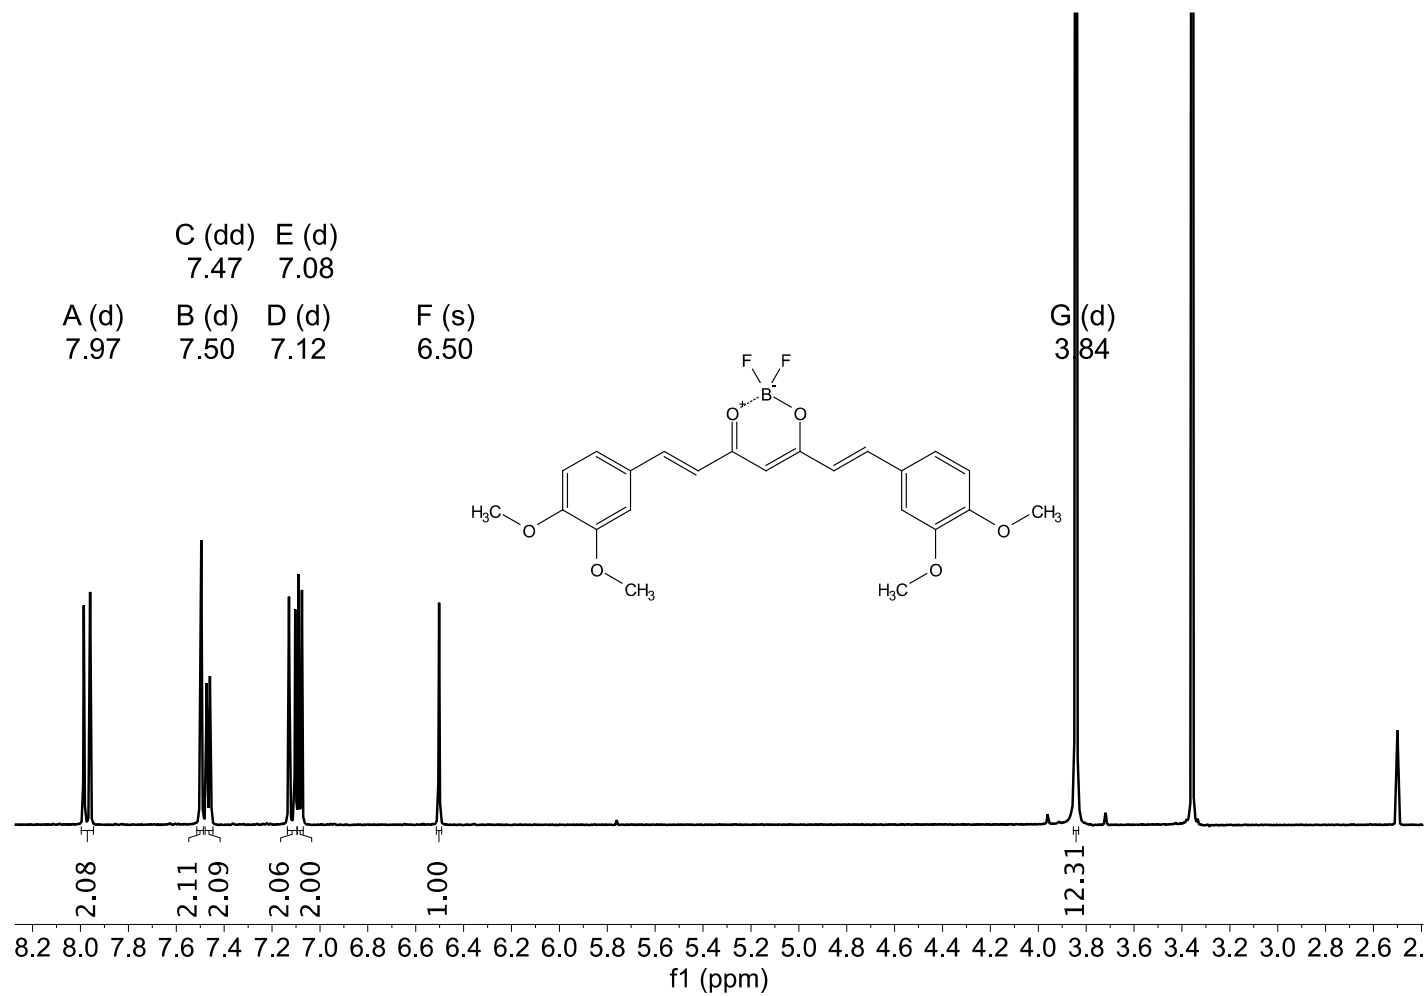

**Fig S1.** <sup>1</sup>H NMR spectrum of Dimethoxycurcumin-BF<sub>2</sub> ( DiMeOC-BF<sub>2</sub>, 400 MHz, DMSO-*d*<sub>6</sub>).

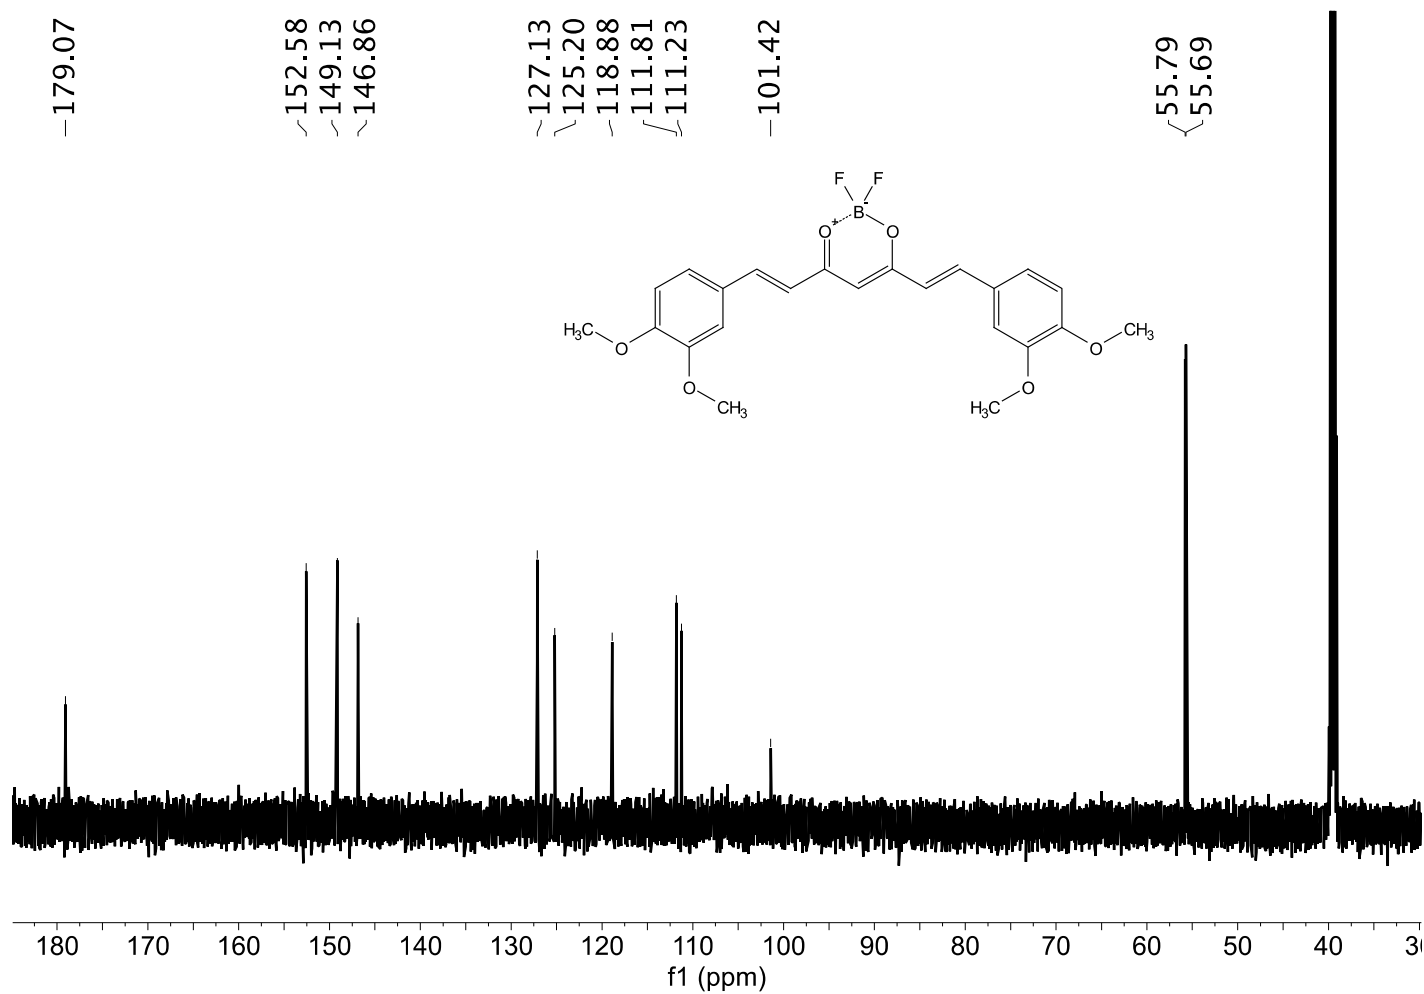

**Fig S2.**  $^{13}\text{C}$  NMR spectrum of Dimethoxycurcumin- $\text{BF}_2$  ( DiMeOC- $\text{BF}_2$ , 100 MHz,  $\text{DMSO-}d_6$ ).

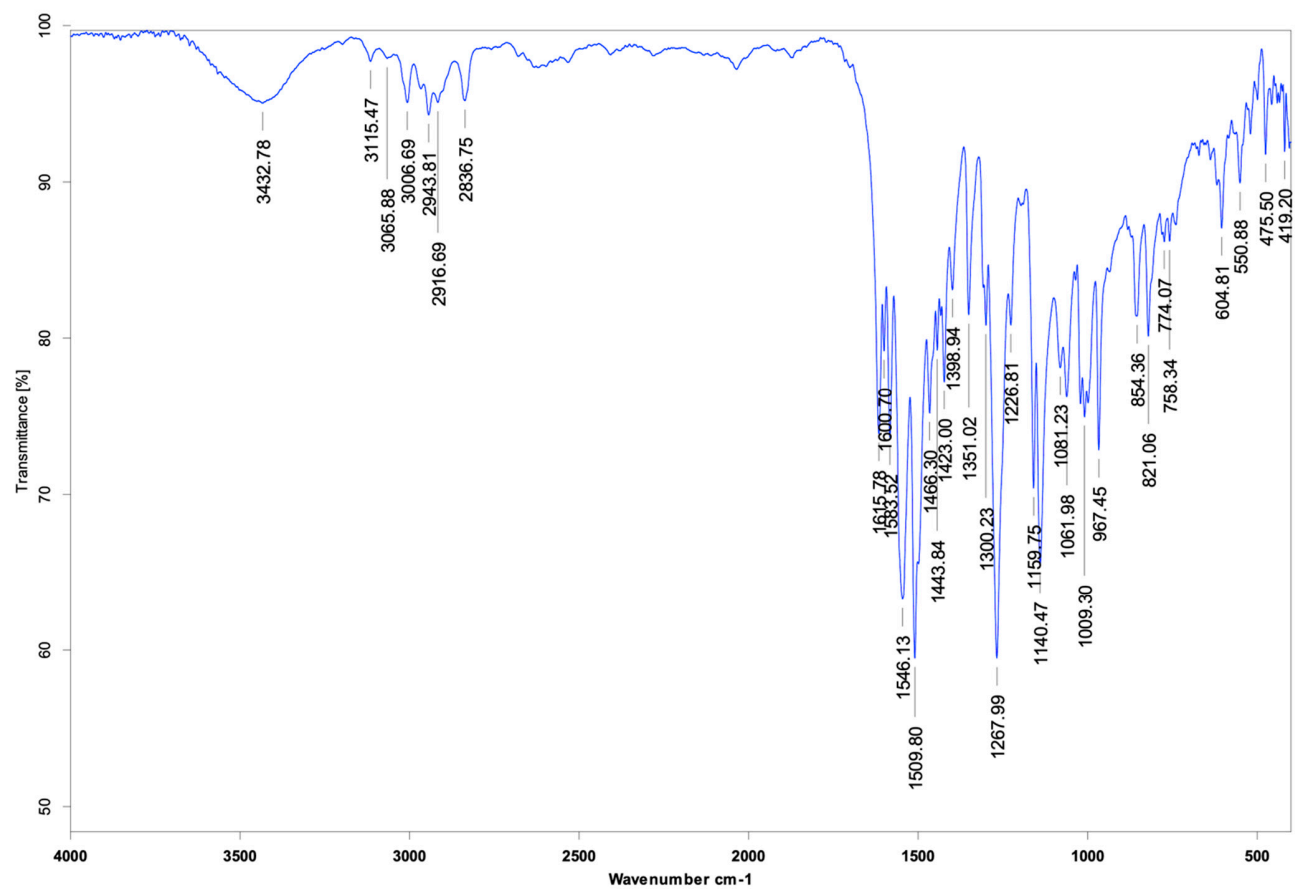

**Fig S3.** IR Spectrum of DiMeOC-BF<sub>2</sub>.

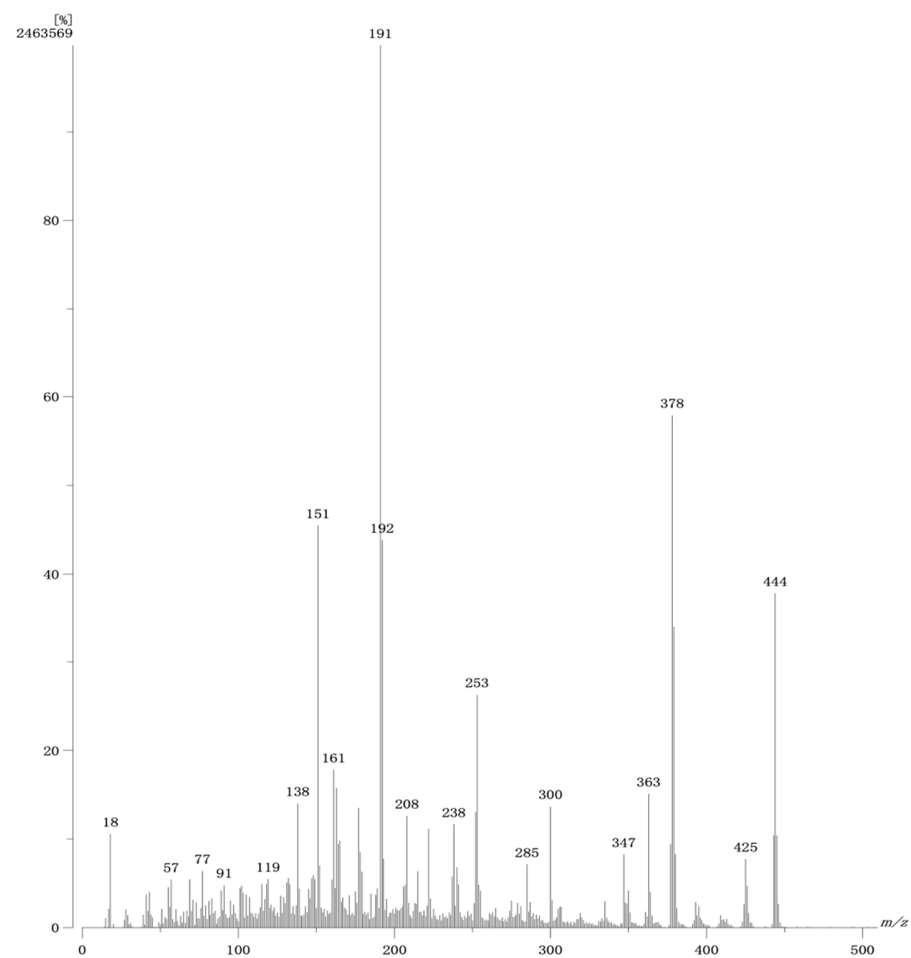

**Fig S4.** Mass Spectrum of DiMeOC-BF<sub>2</sub> (IE<sup>+</sup>).

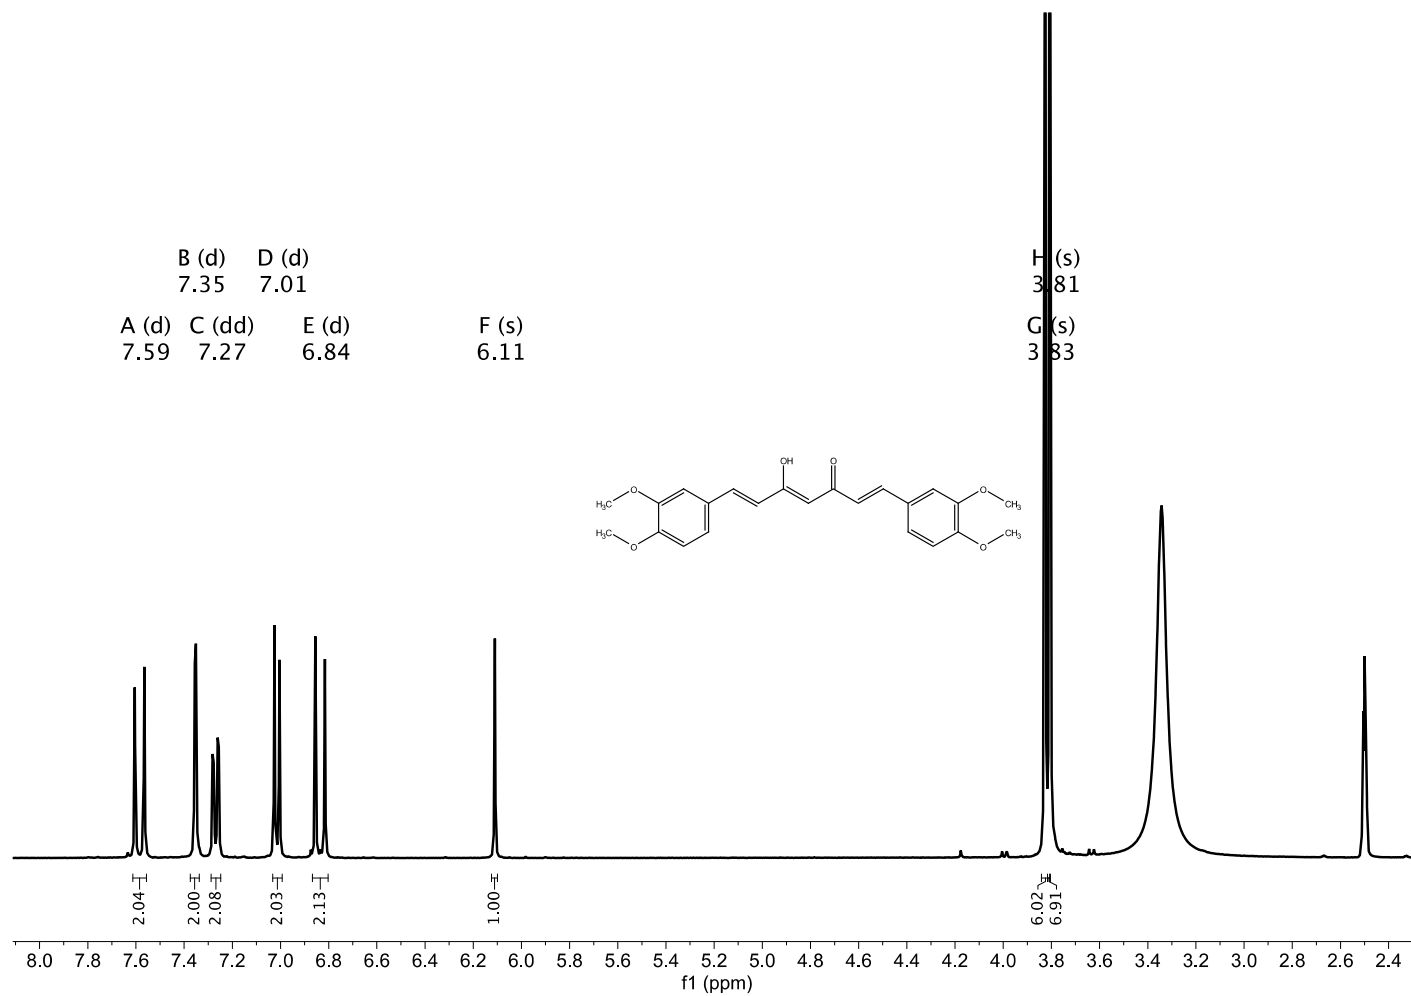

**Fig S5.** <sup>1</sup>H NMR spectrum of DiMeOC (400 MHz, DMSO- $d_6$ ).

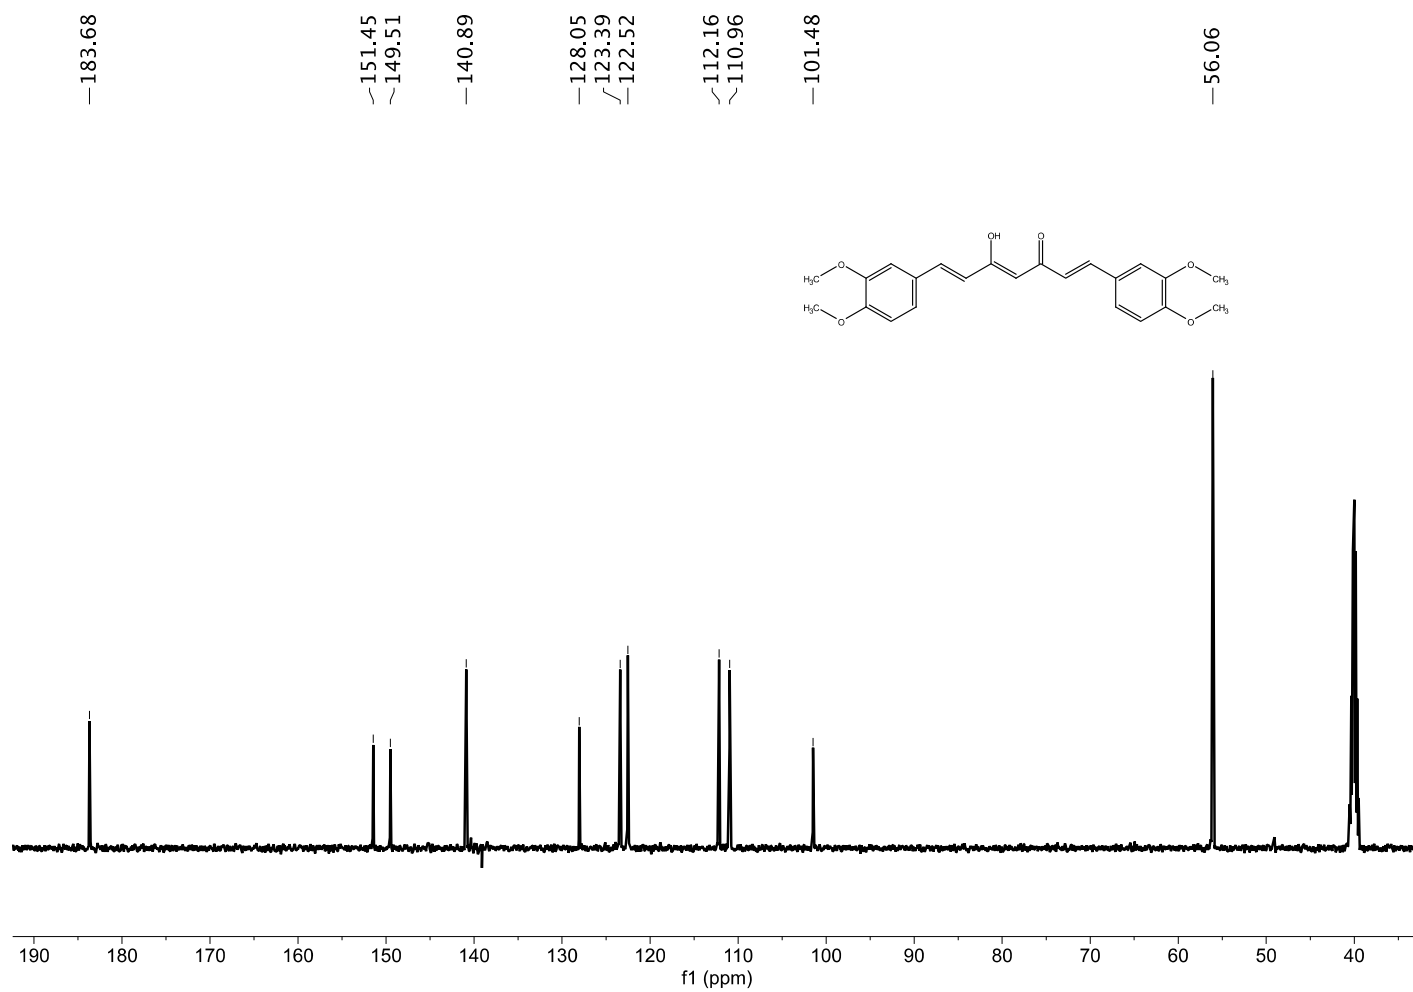

**Fig S6.** <sup>13</sup>C NMR spectrum of DiMeOC (100 MHz, DMSO-*d*<sub>6</sub>).

\*\*\* PEAK-PICK \*\*\*

| -- PEAK -- |       | -- VALLEY -- |        |
|------------|-------|--------------|--------|
| $\lambda$  | ABS   | $\lambda$    | ABS    |
| 417.0      | 0.975 | 641.0        | -0.002 |
| 262.0      | 0.215 | 288.0        | 0.098  |
| 220.0      | 0.271 | 246.0        | 0.173  |

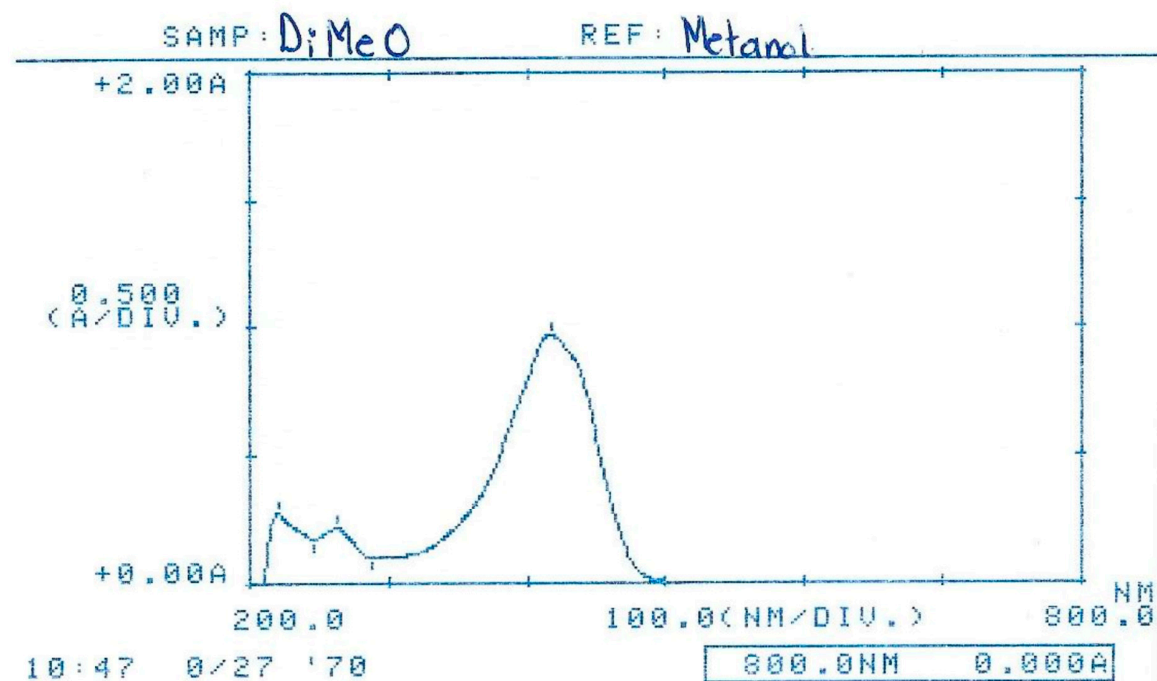

Fig S7. UV-VIS spectrum in methanol of DiMeOC.

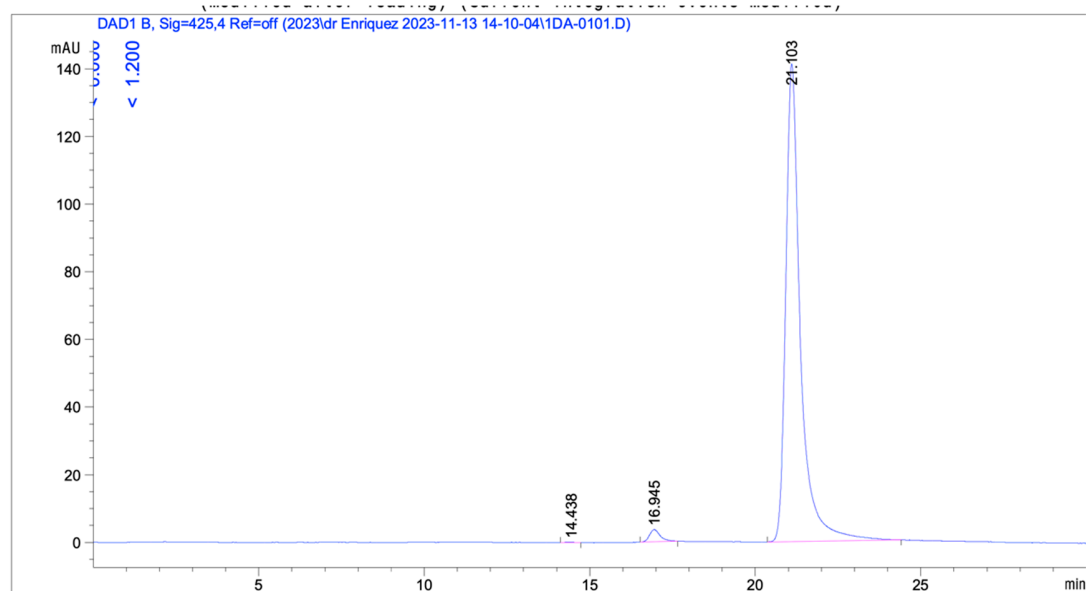

Signal 1: DAD1 B, Sig=425,4 Ref=off

| Peak # | RetTime [min] | Type | Width [min] | Area [mAU*s] | Height [mAU] | Area %  |
|--------|---------------|------|-------------|--------------|--------------|---------|
| 1      | 14.438        | BB   | 0.2067      | 3.60961      | 2.16300e-1   | 0.0812  |
| 2      | 16.945        | BB   | 0.3063      | 82.44865     | 3.63930      | 1.8543  |
| 3      | 21.103        | BB   | 0.4564      | 4360.39209   | 141.14056    | 98.0646 |

Totals : 4446.45035 144.99616

**Fig S8.** HPLC spectrum of DiMeOC (417nm, CH<sub>3</sub>CN/H<sub>2</sub>O (0.02% formic acid) 55:45)

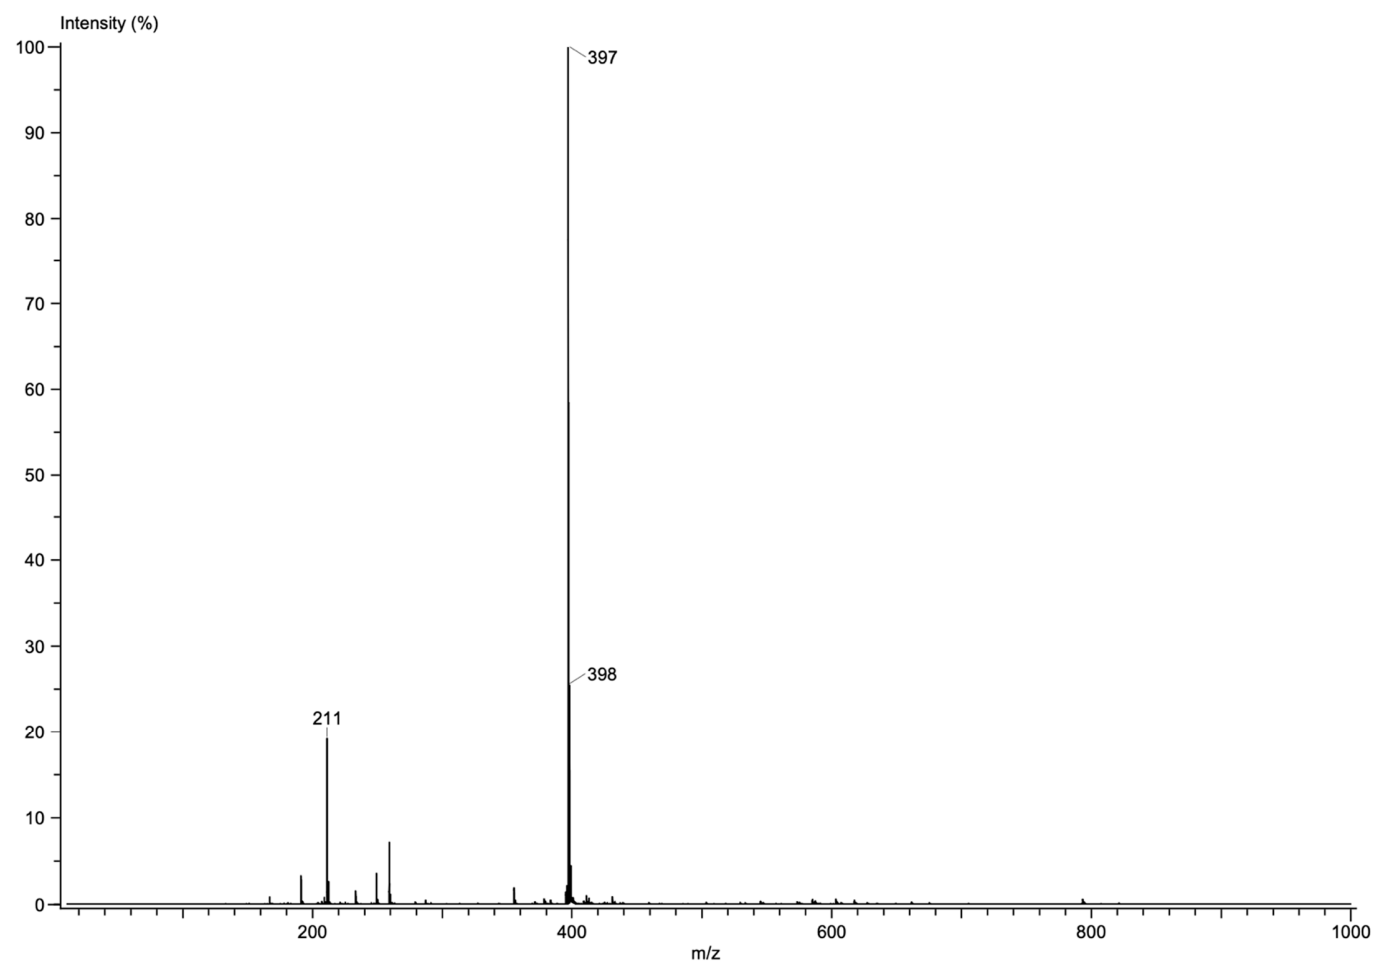

**Fig S9.** Mass Spectrum of DiMeOC (DART<sup>+</sup>).

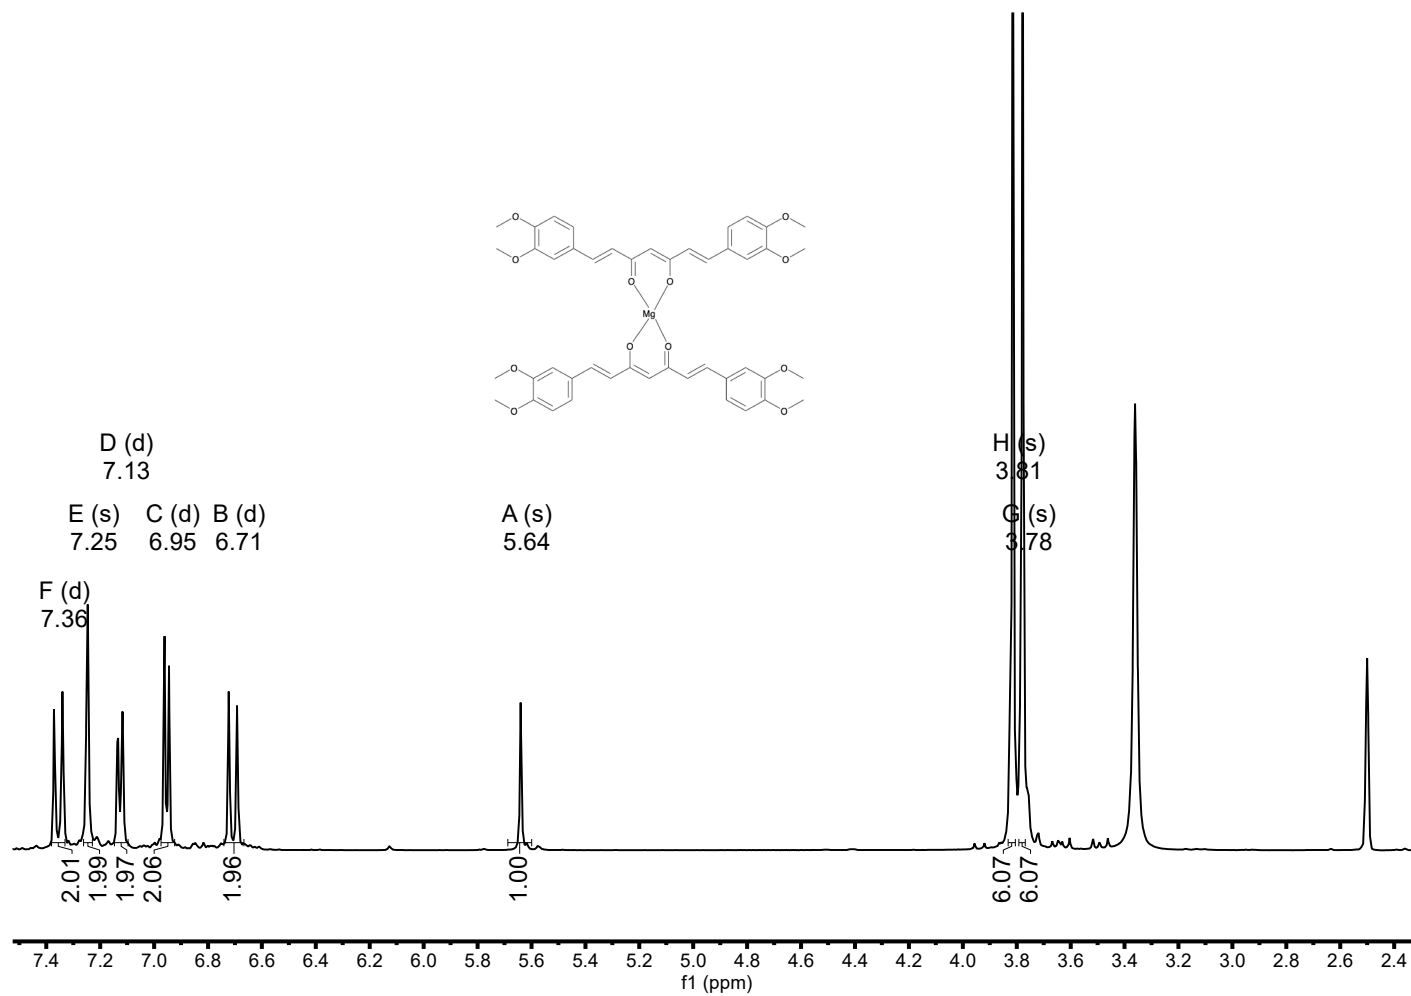

**Fig S10.**  $^1\text{H}$  NMR spectrum of DiMeOC-Mg (400 MHz,  $\text{DMSO}-d_6$ )

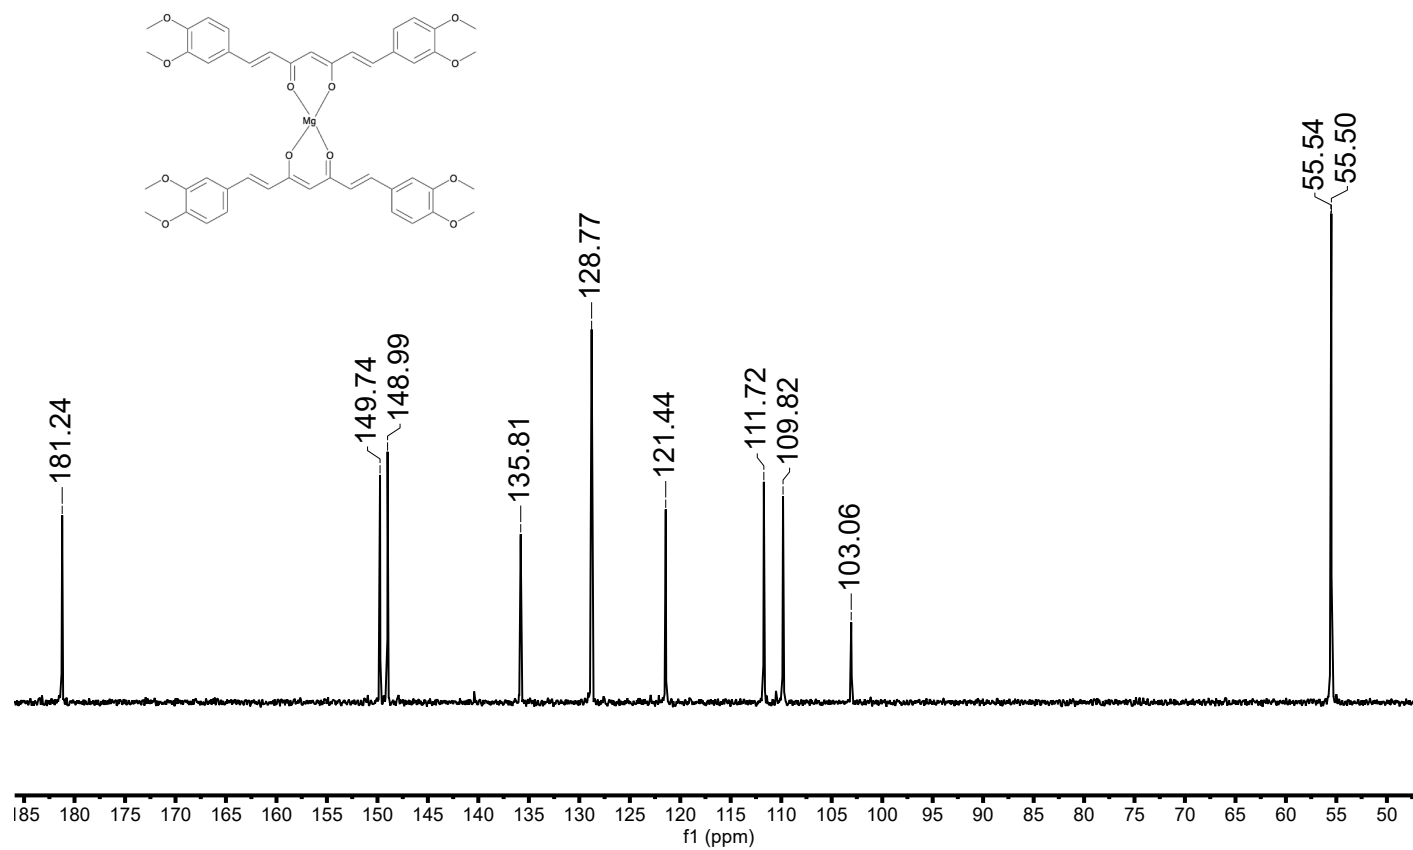

**Fig S11.**  $^{13}\text{C}$  NMR spectrum of DiMeOC-Mg (100 MHz,  $\text{DMSO-}d_6$ ).

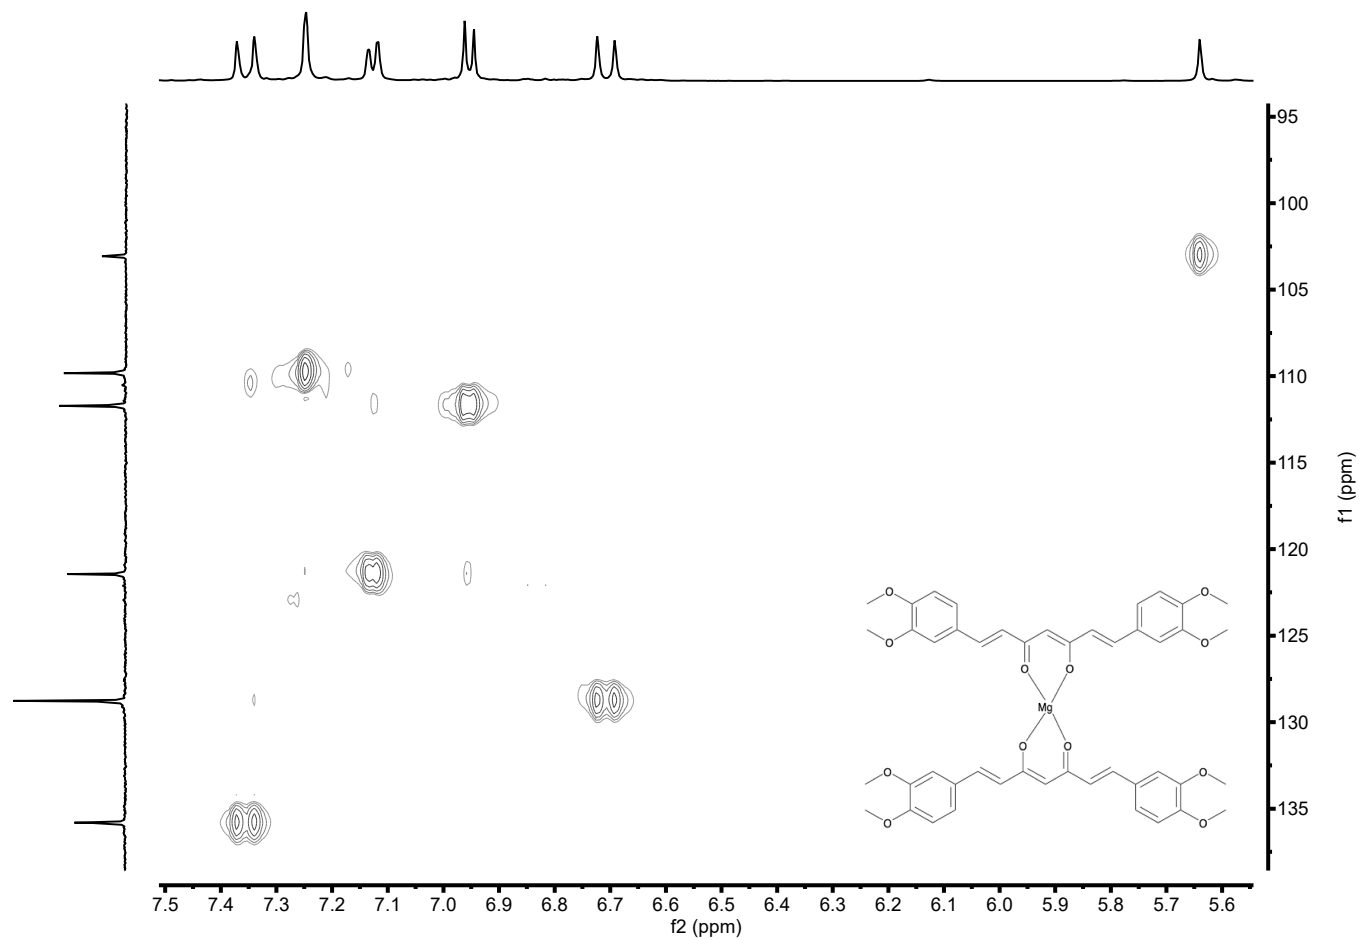

**Fig S12.** HSQC NMR spectrum of DiMeOC-Mg (400 MHz, DMSO- $d_6$ ).

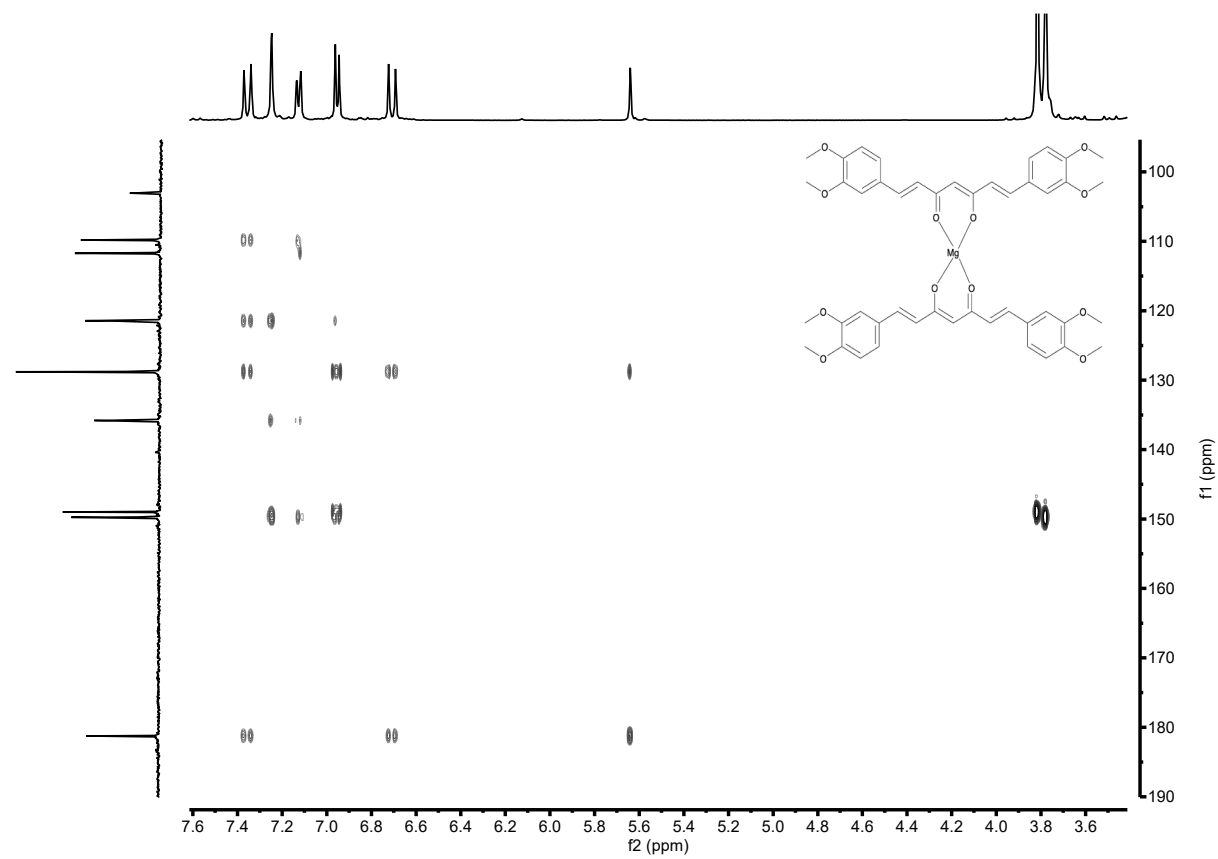

**Fig S13.** HMBC NMR spectrum of DiMeOC-Mg (400 MHz, DMSO-*d*<sub>6</sub>).

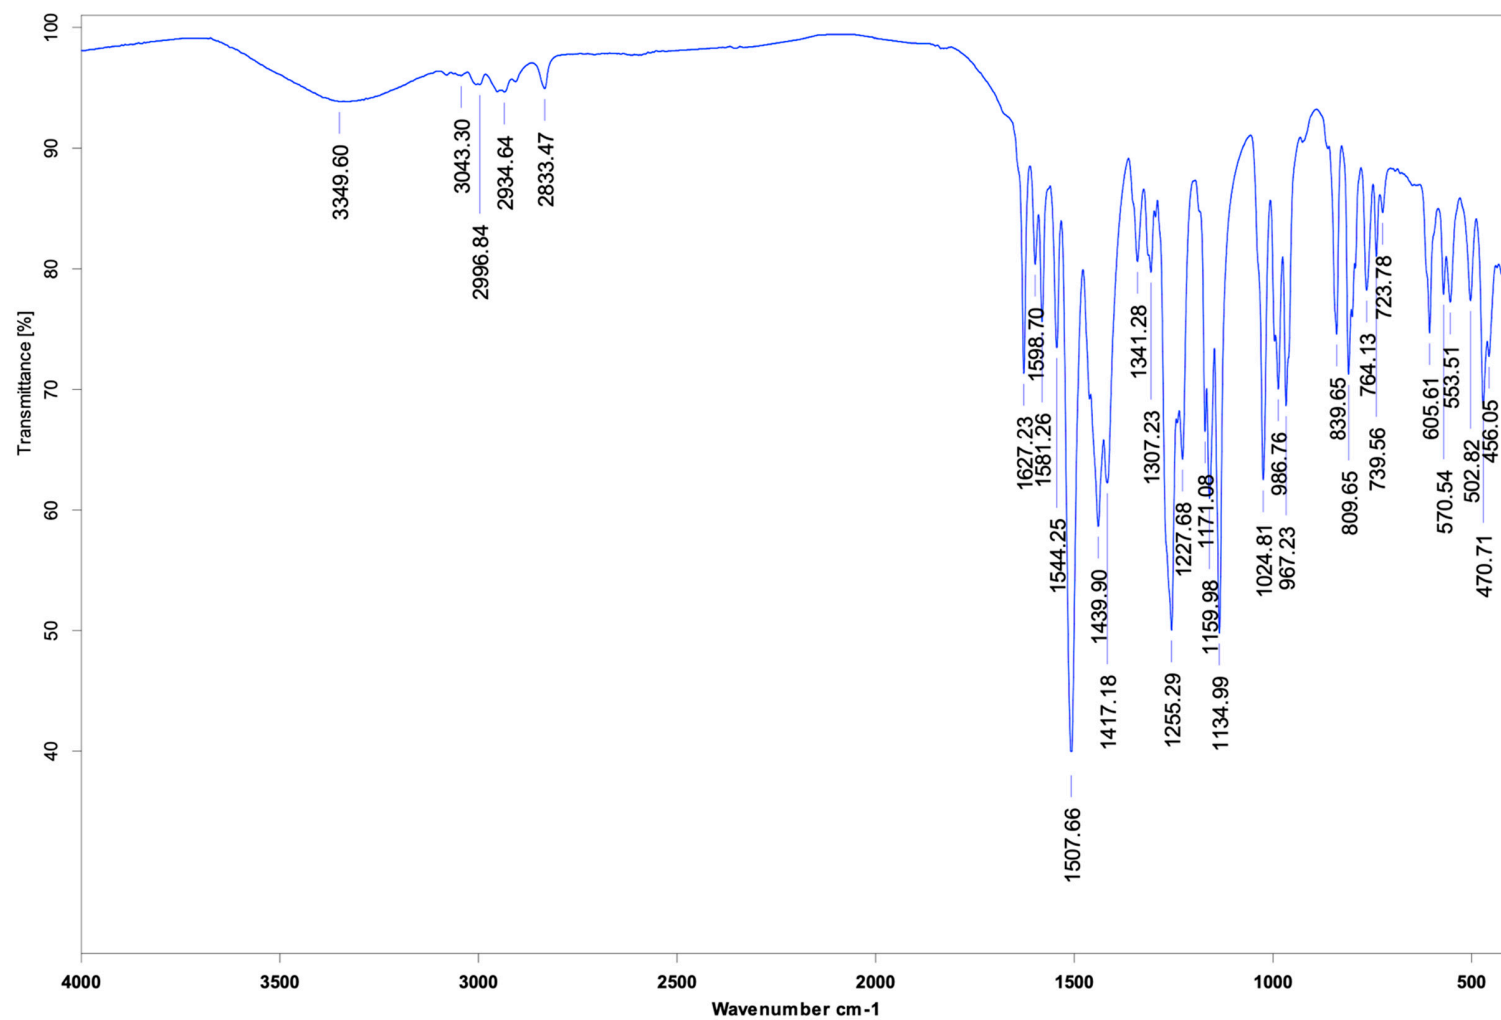

**Fig S14.** IR Spectrum of DiMeOC-Mg.

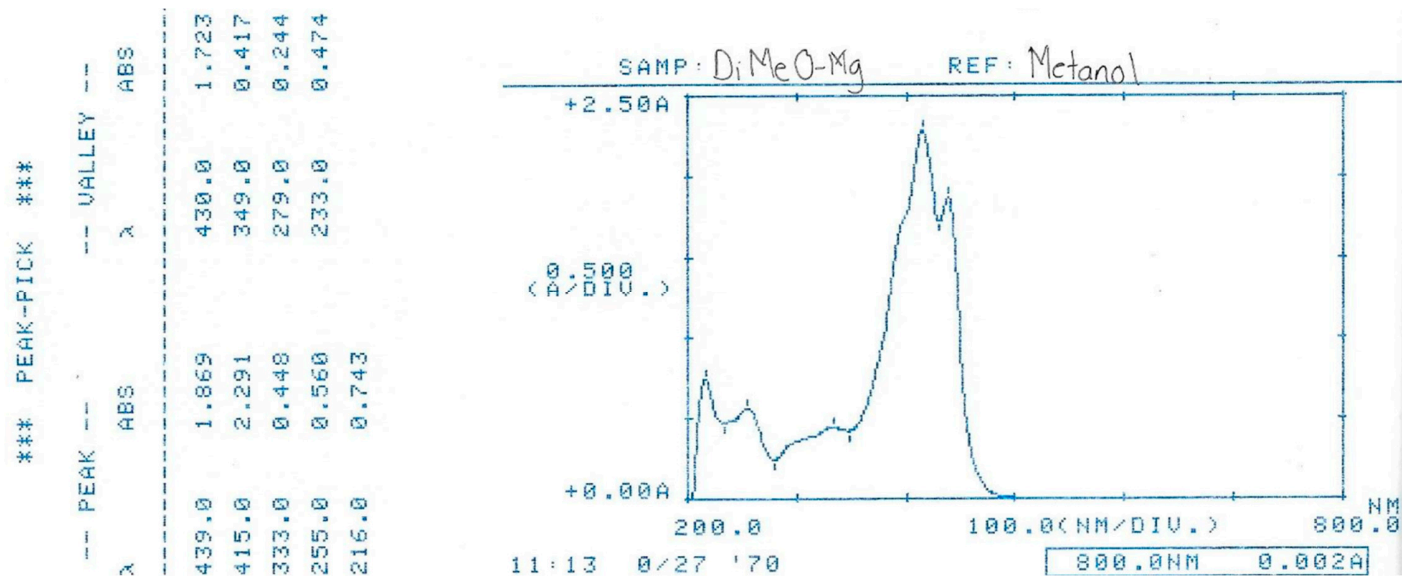

**Fig S15.** UV-VIS spectrum in methanol of DiMeOC-Mg .

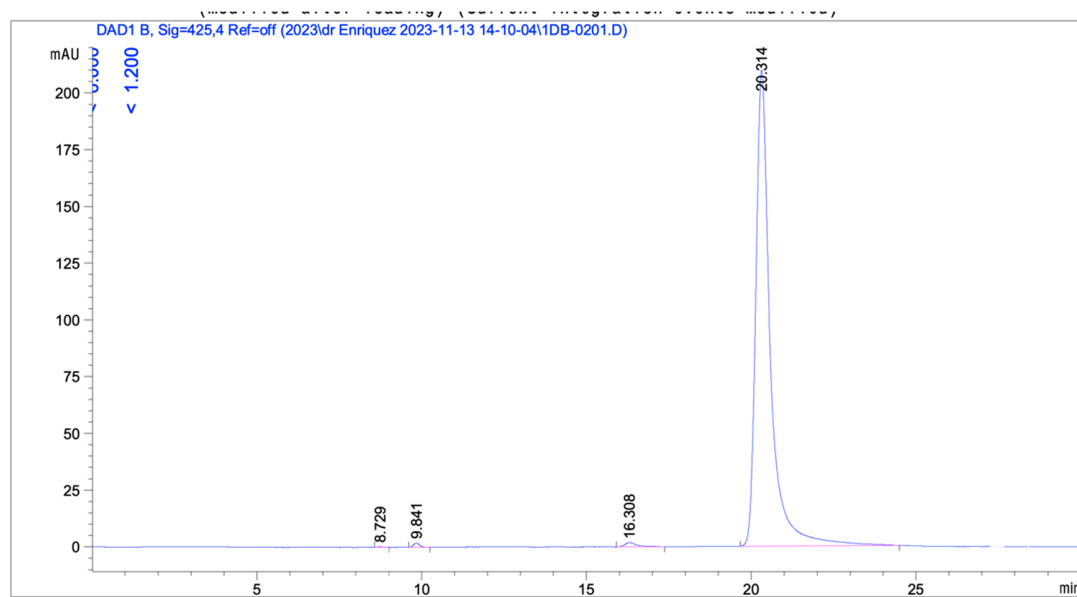

**Fig S16.** HPLC spectrum of DiMeOC-Mg (417 nm, CH<sub>3</sub>CN/H<sub>2</sub>O (0.02% formic acid) 55:45).

Signal 1: DAD1 B, Sig=425,4 Ref=off

| Peak # | RetTime [min] | Type | Width [min] | Area [mAU*s] | Height [mAU] | Area %  |
|--------|---------------|------|-------------|--------------|--------------|---------|
| 1      | 8.729         | BB   | 0.1436      | 3.30270      | 3.01962e-1   | 0.0507  |
| 2      | 9.841         | BB   | 0.1913      | 23.72007     | 1.90404      | 0.3642  |
| 3      | 16.308        | BV R | 0.3436      | 50.56177     | 1.91799      | 0.7763  |
| 4      | 20.314        | BB   | 0.4502      | 6435.36230   | 209.61371    | 98.8088 |

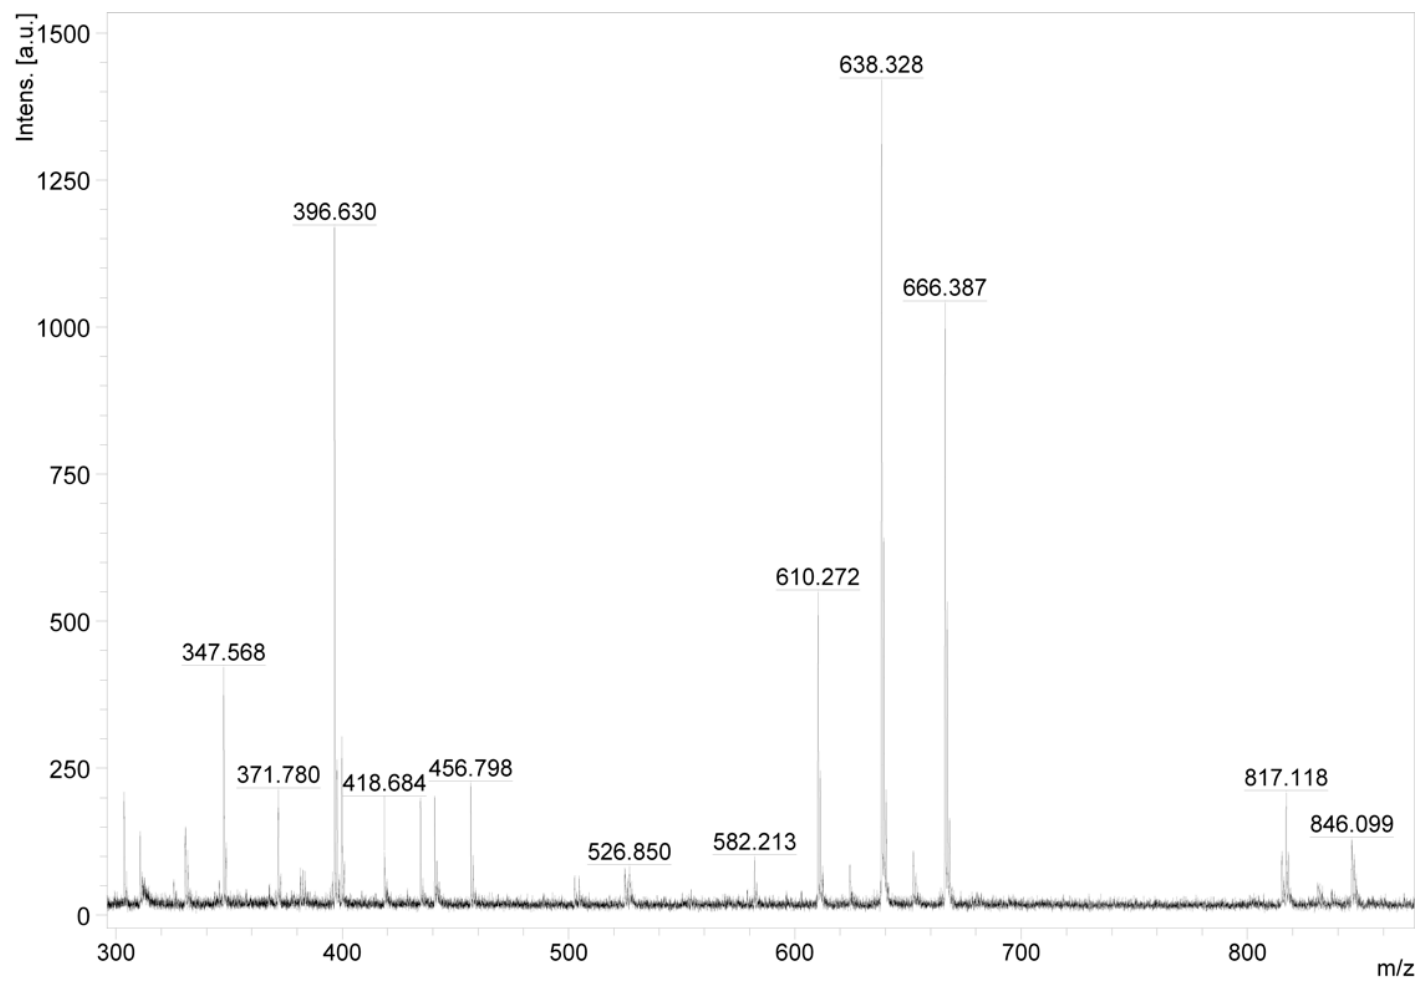

**Fig S17.** Mass Spectrum of DiMeOC-Mg (MALDI-TOF).

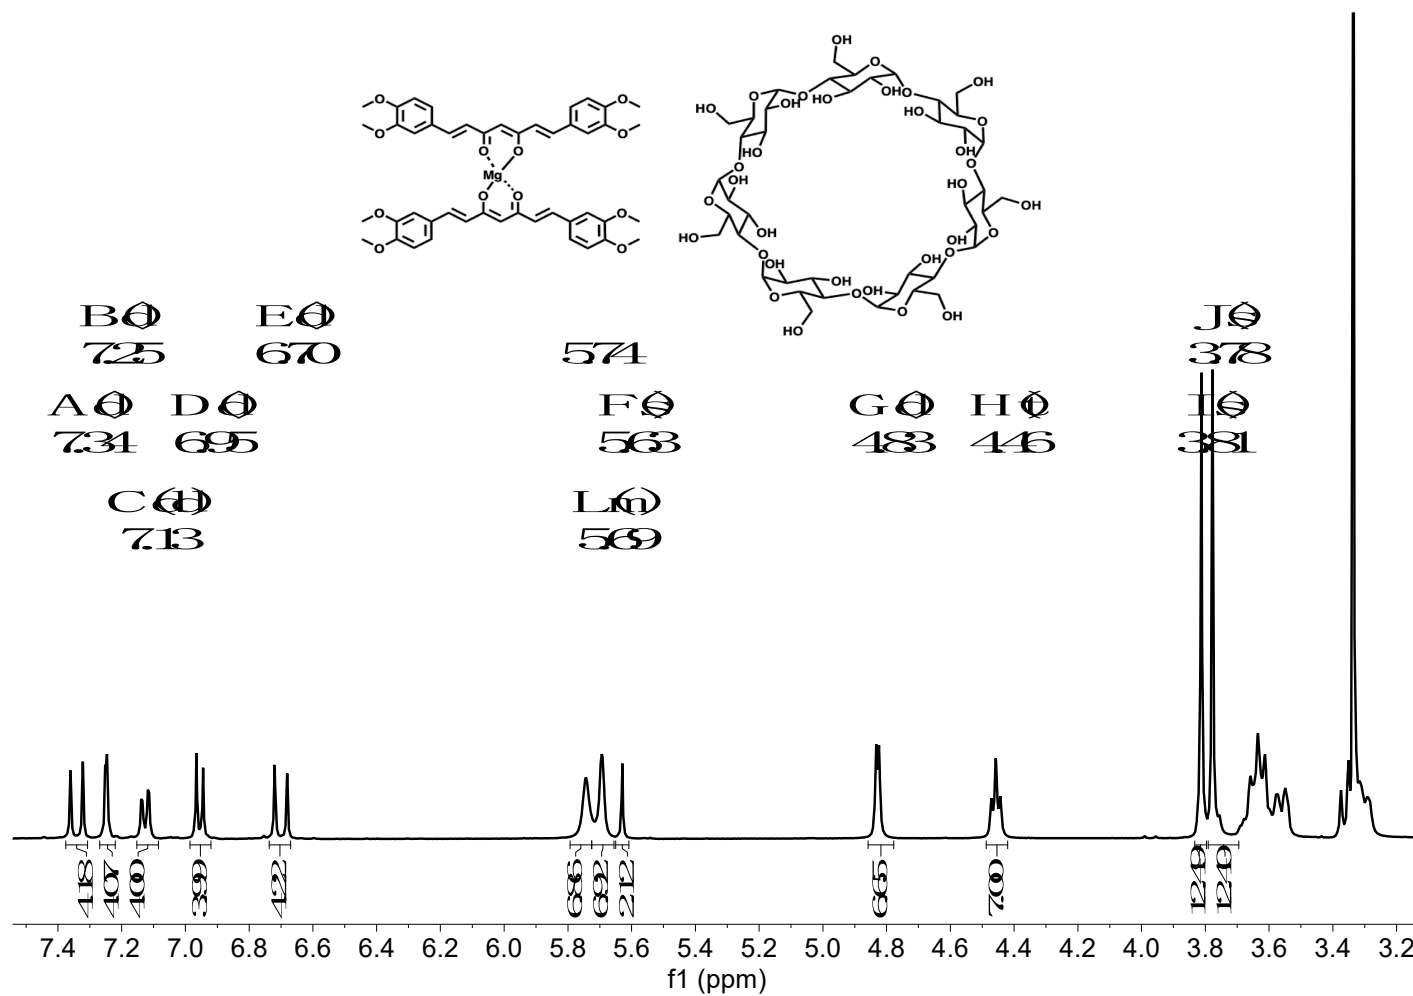

**Fig S18.**  $^1\text{H}$  NMR spectrum of DiMeOC-Mg-BCD (400 MHz,  $\text{DMSO-}d_6$ ).

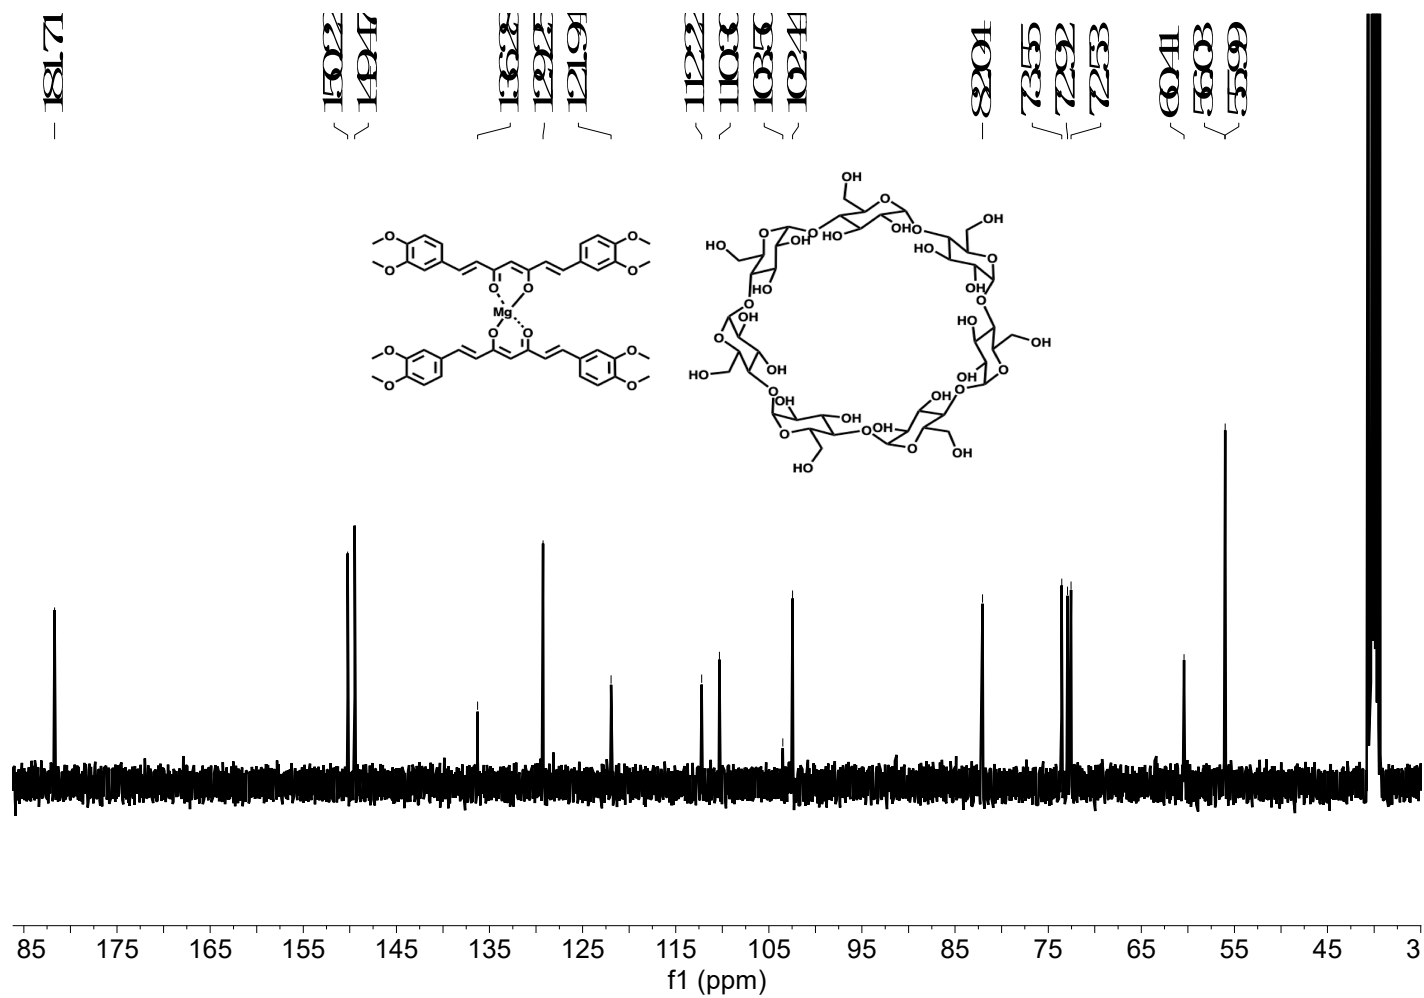

**Fig S19.**  $^{13}\text{C}$  NMR spectrum of DiMeOC-Mg-BCD (100 MHz,  $\text{DMSO}-d_6$ ).

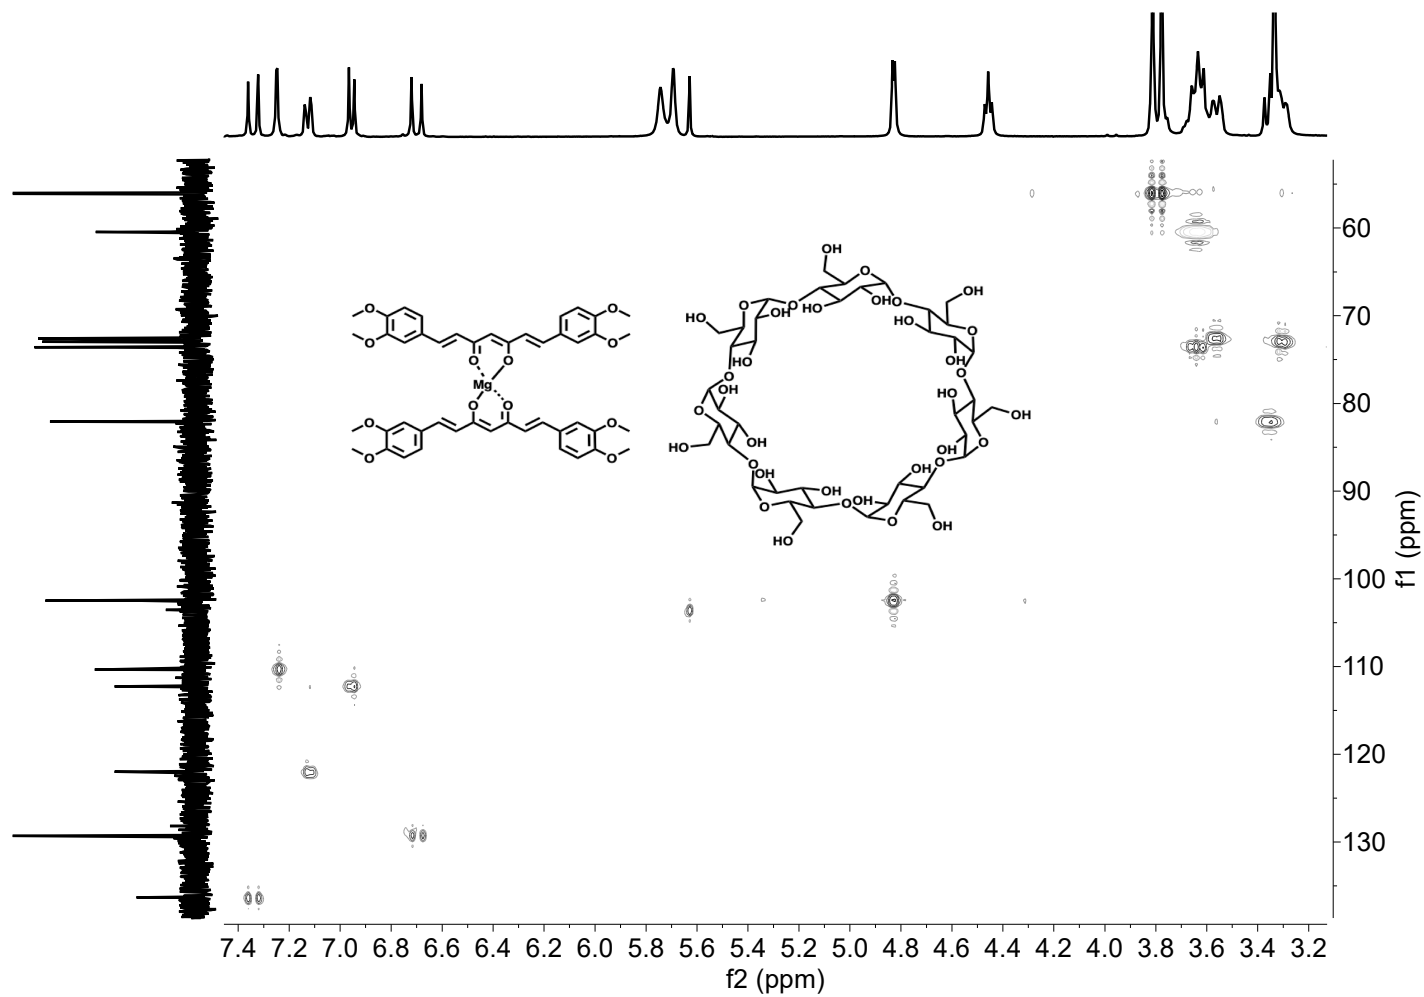

**Fig S20.** HSQC NMR spectrum of DiMeOC-Mg-BCD (400 MHz,  $\text{DMSO-}d_6$ ).

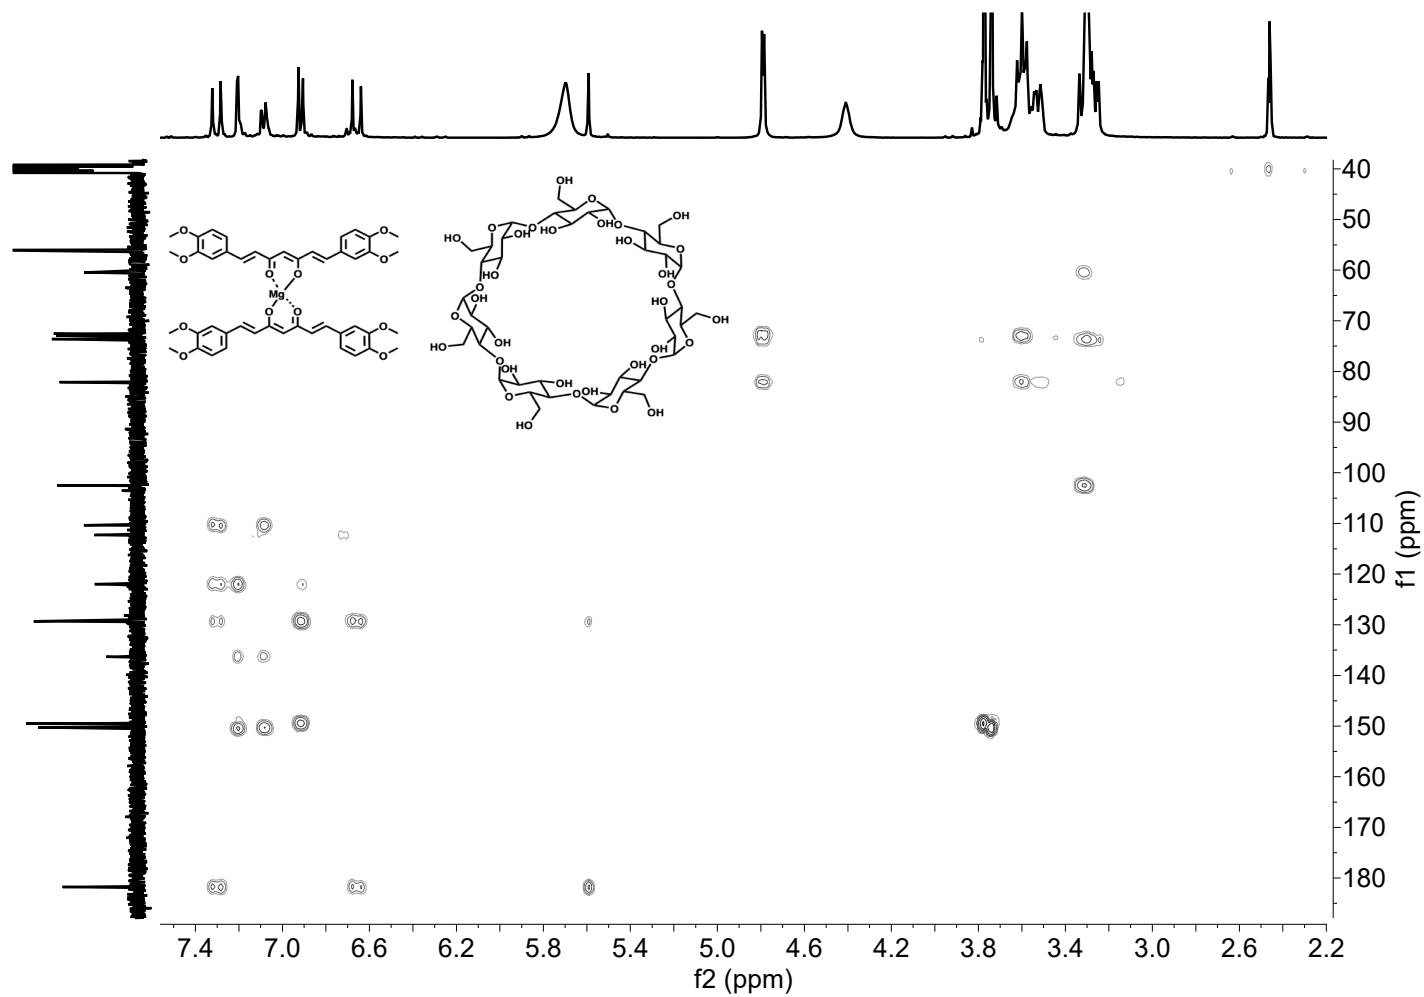

**Fig S21.** HMBC NMR spectrum of DiMeOC-Mg-BCD (400 MHz,  $\text{DMSO-}d_6$ ).

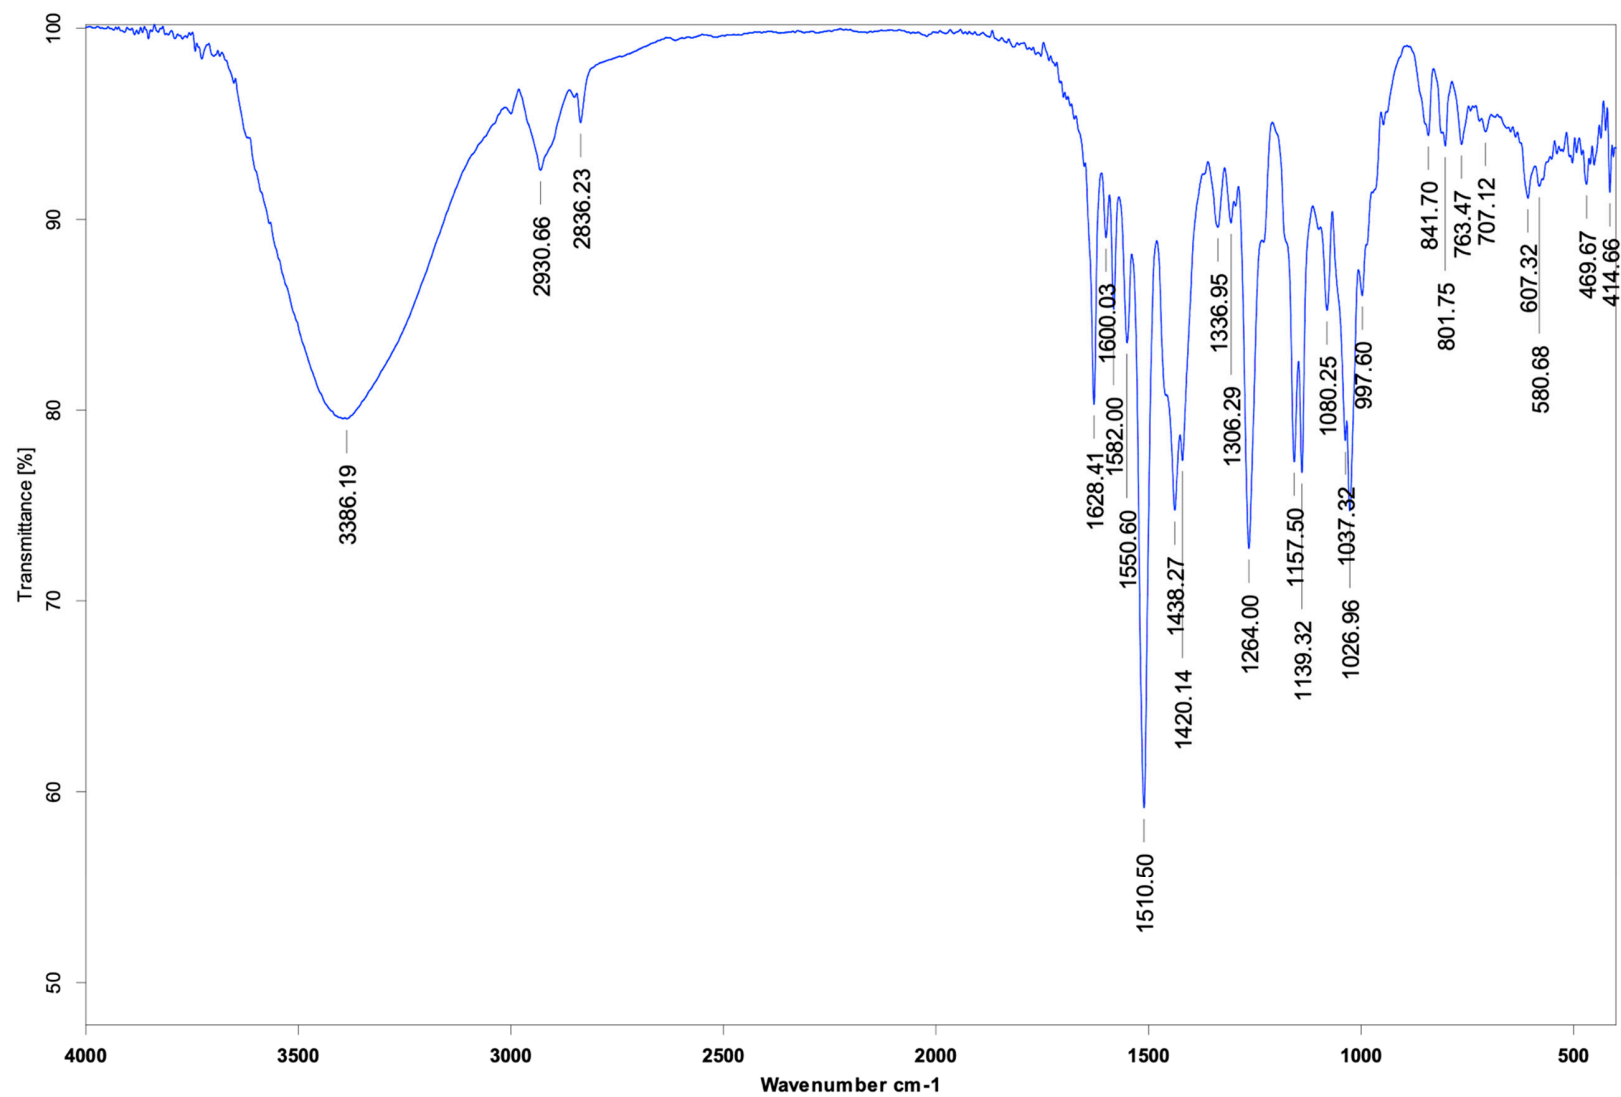

**Fig S22.** IR Spectrum of DiMeOC-Mg-BCD.

| -- PEAK -- |       | -- VALLEY -- |        |
|------------|-------|--------------|--------|
| $\lambda$  | ABS   | $\lambda$    | ABS    |
| 427.0      | 0.782 |              |        |
| 416.0      | 0.888 | 640.0        | -0.002 |
| 257.0      | 0.185 | 283.0        | 0.088  |
| 219.0      | 0.243 | 245.0        | 0.159  |

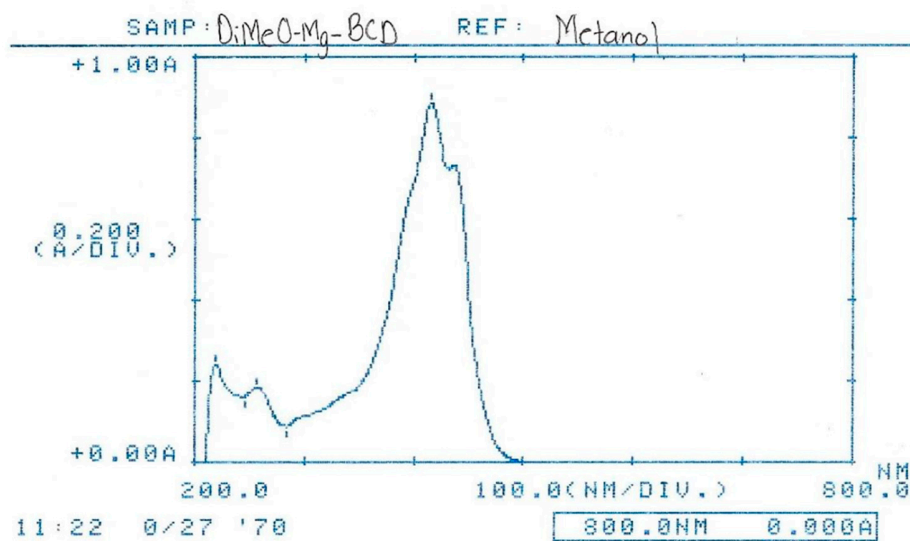

**Fig S23.** UV-VIS spectrum in methanol of DiMeOC-Mg-BCD .

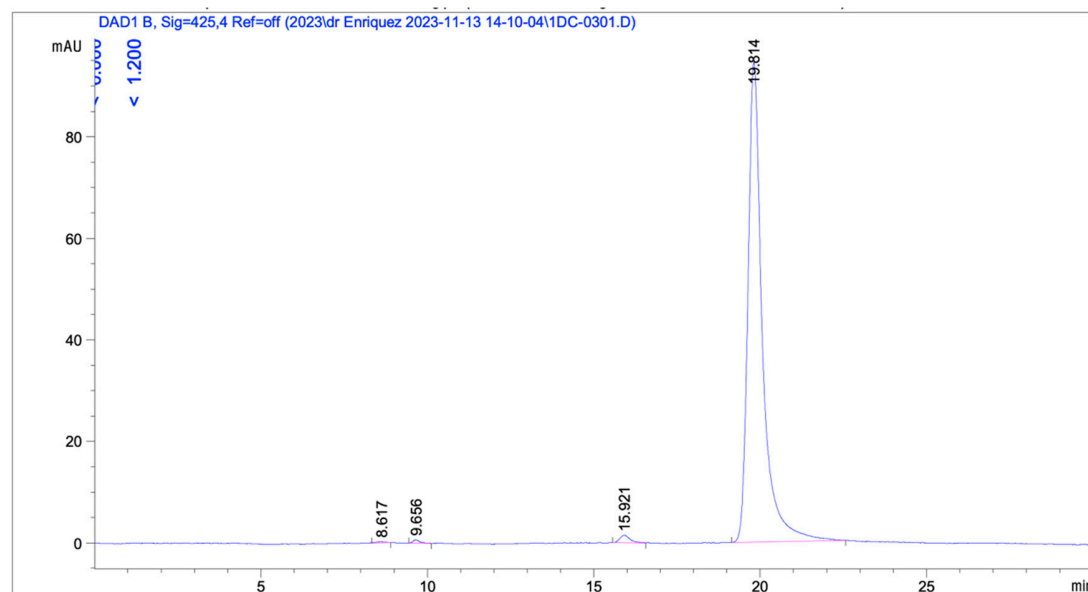

**Fig S24.** HPLC spectrum of DiMeOC-Mg-BCD (417nm, CH<sub>3</sub>CN/H<sub>2</sub>O (0.02% formic acid) 55:45).

| Peak # | RetTime [min] | Type | Width [min] | Area [mAU*s] | Height [mAU] | Area %  |
|--------|---------------|------|-------------|--------------|--------------|---------|
| 1      | 8.617         | BB   | 0.1878      | 3.62682      | 2.37953e-1   | 0.1252  |
| 2      | 9.656         | BB   | 0.1708      | 8.75976      | 6.51972e-1   | 0.3023  |
| 3      | 15.921        | BB   | 0.2585      | 31.41060     | 1.49874      | 1.0841  |
| 4      | 19.814        | BB   | 0.4463      | 2853.59155   | 94.51001     | 98.4884 |

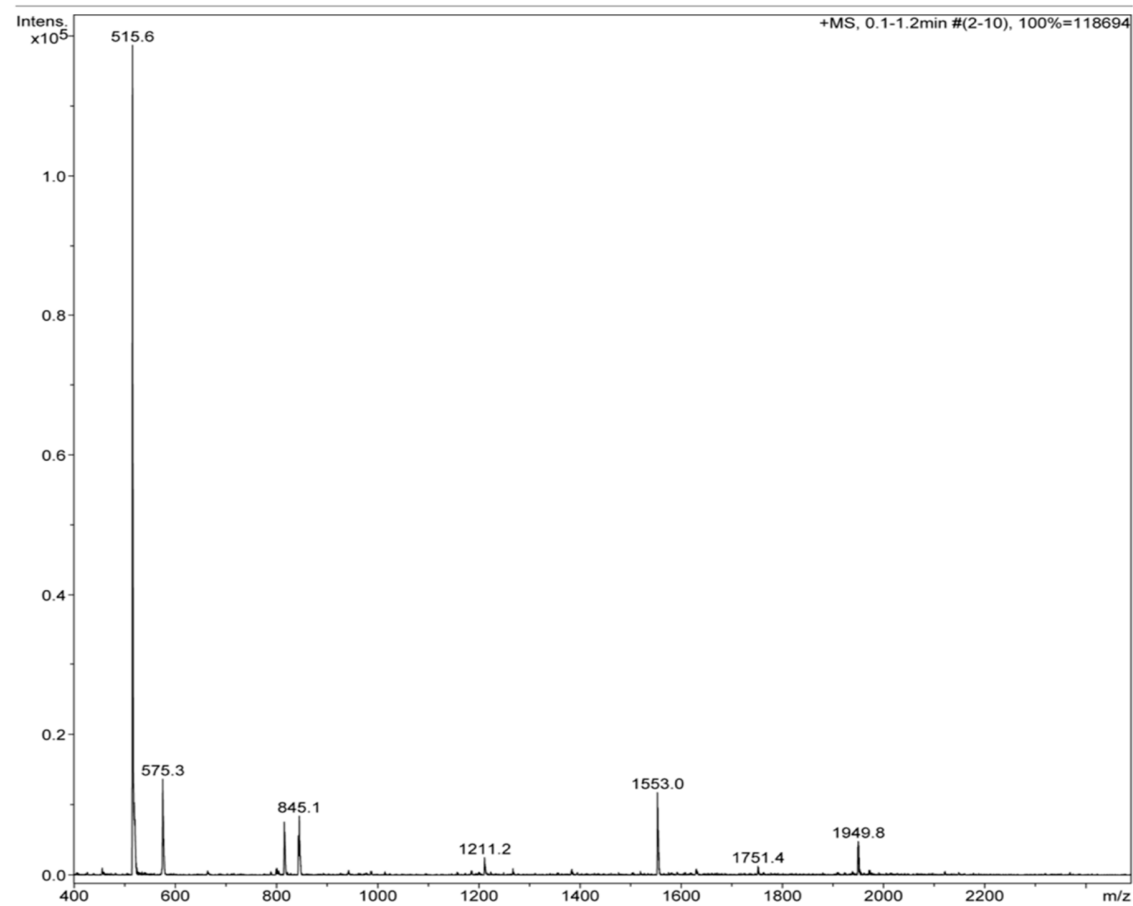

**Fig S25.** Mass Spectrum of DiMeOC-Mg-BCD (ESI).

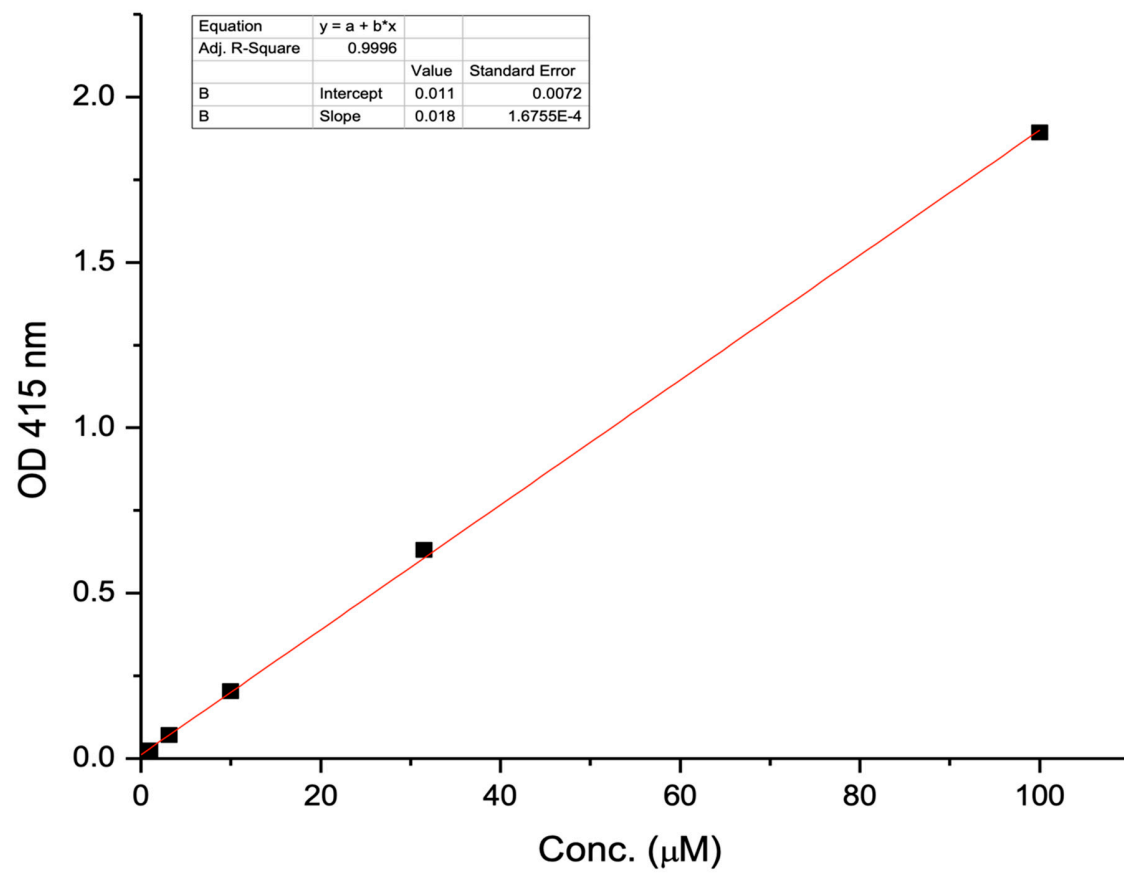

**Fig S26.** Standard curve of DiMeOC-Mg (415nm, 1-Octanol).

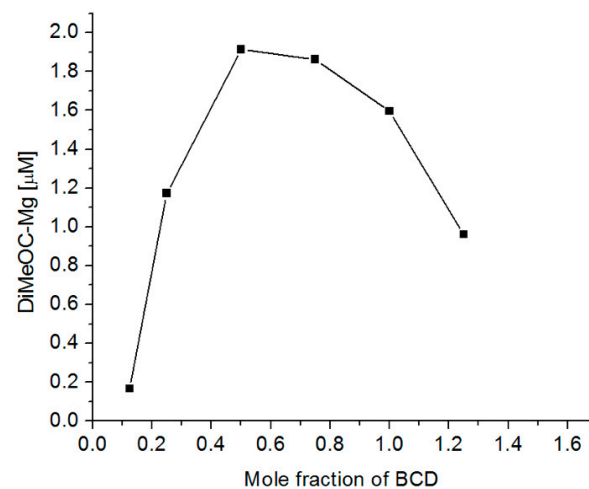

**Fig S27.** Inclusion ratio DiMeOC-Mg and BCD (PBS media).

The inclusion ratio test results between DiMeOC-Mg and BCD are shown in Fig. s27. The mole fraction represents  $r$  of BCD in the mixture. when  $r = 0.5$ , the molar concentration value of DiMeOC-Mg was the largest, concluding that the inclusion complex was formed to the molar ratio of 1:1.

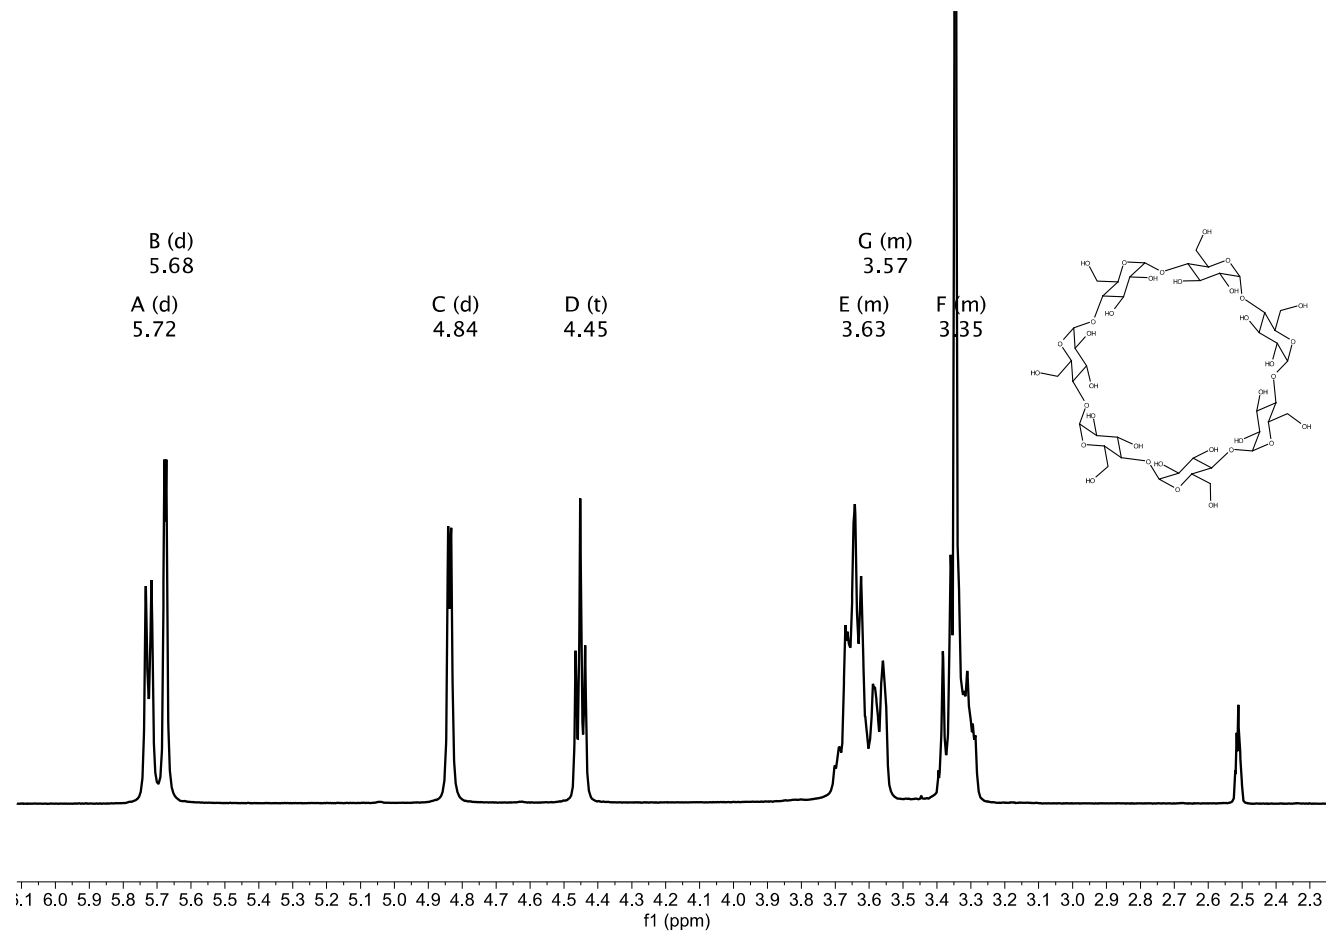

**Fig S28.**  $^1\text{H}$  NMR spectrum of Beta-cyclodextrin (BCD, 400 MHz,  $\text{DMSO-}d_6$ ).

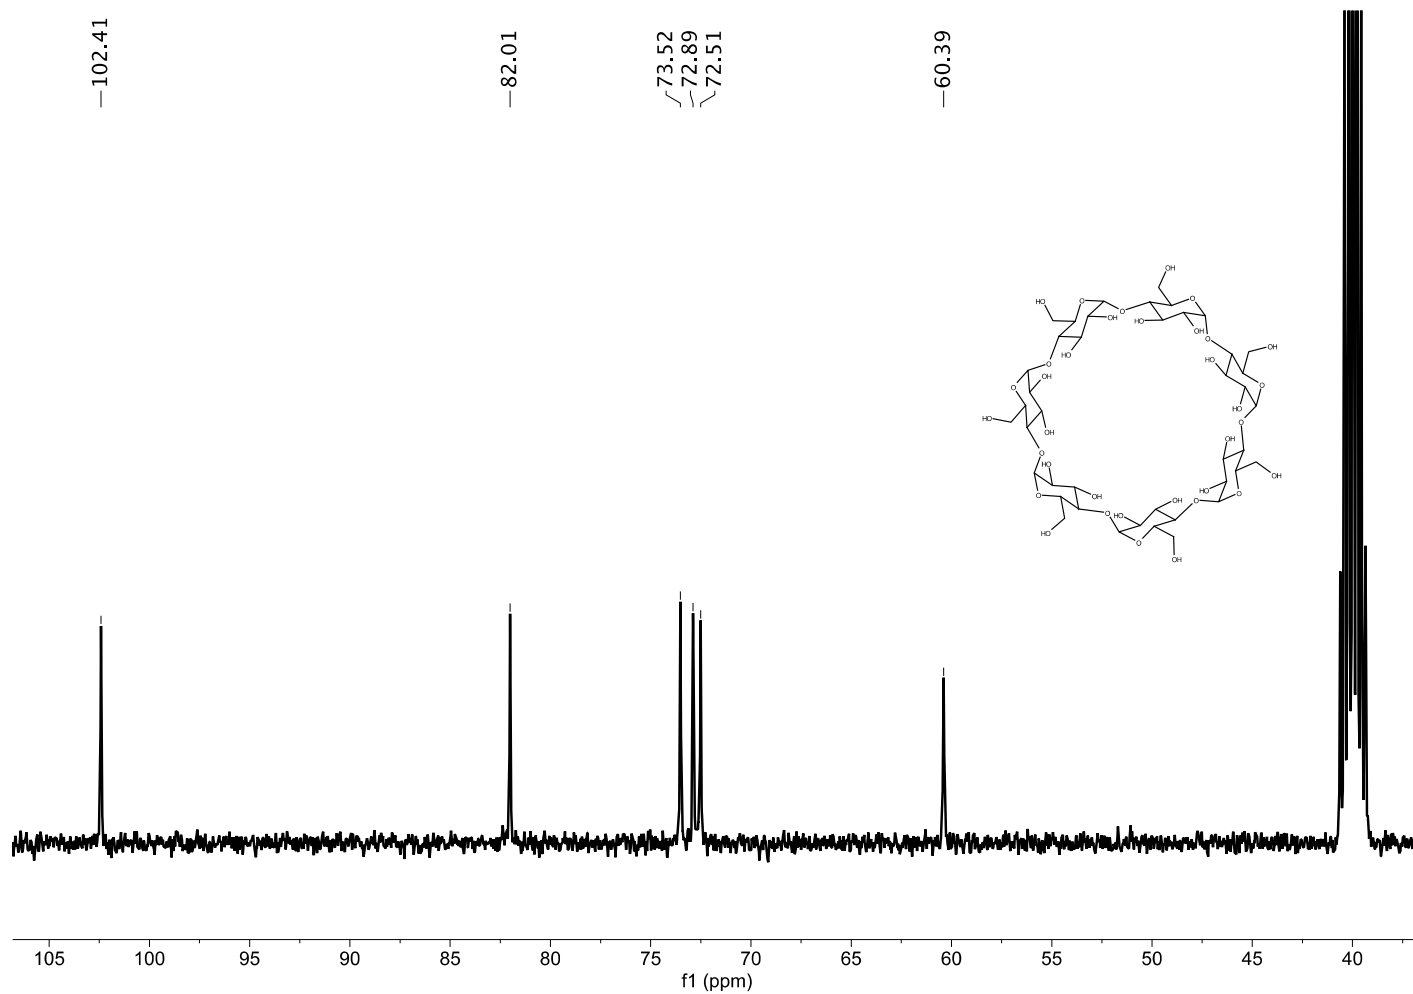

**Fig S29.**  $^{13}\text{C}$  NMR spectrum of BCD (100 MHz,  $\text{DMSO-}d_6$ ).

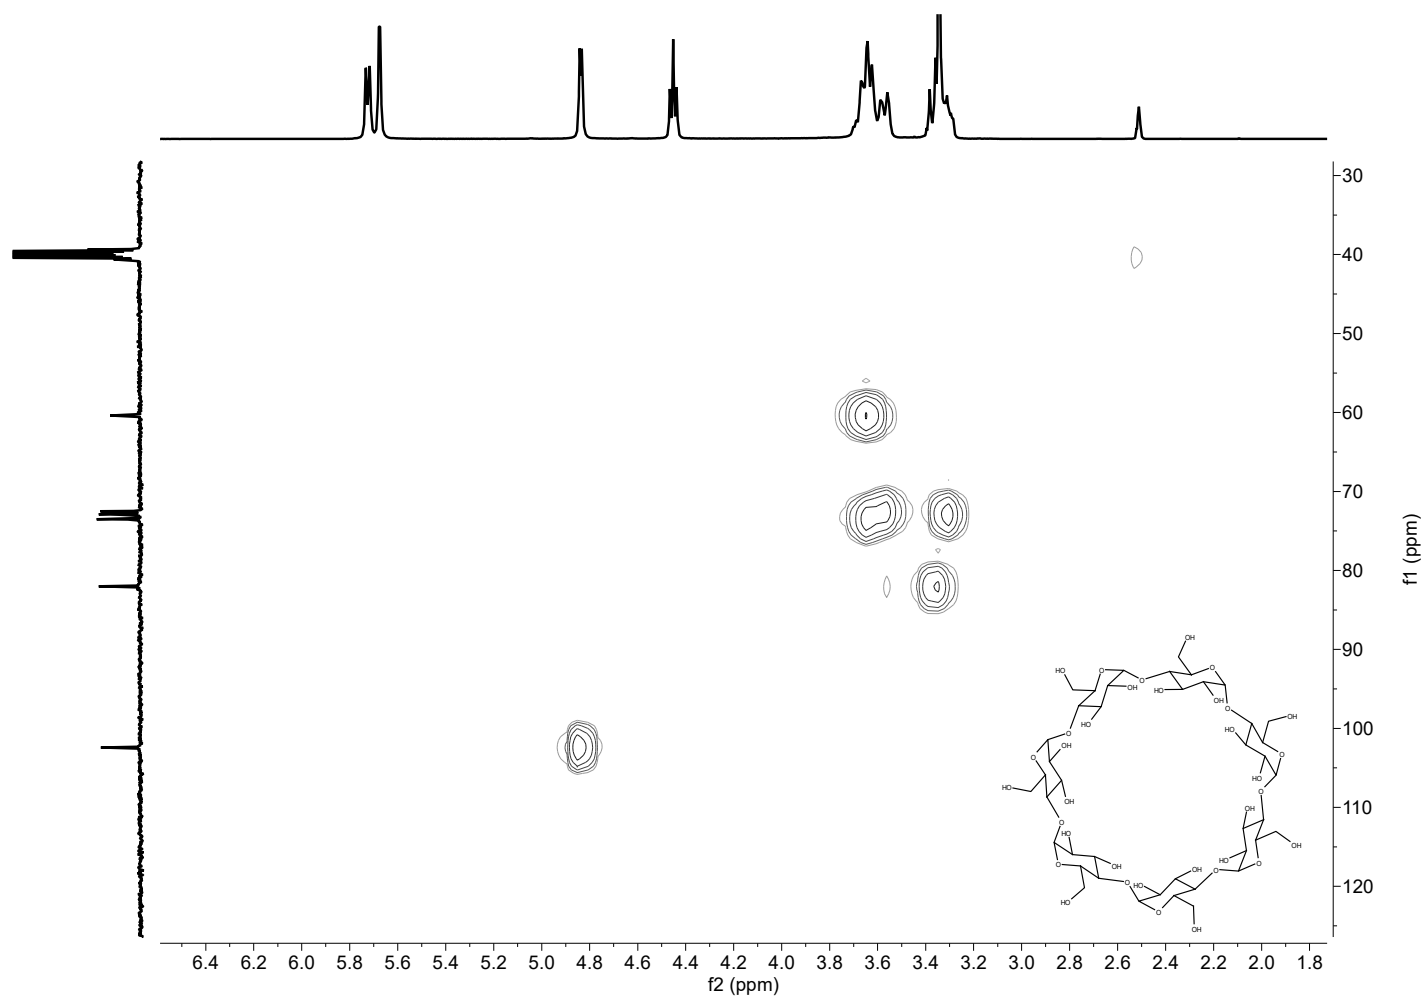

**Fig S30.** HSQC NMR spectrum of BCD (500 MHz, DMSO-*d*<sub>6</sub>).

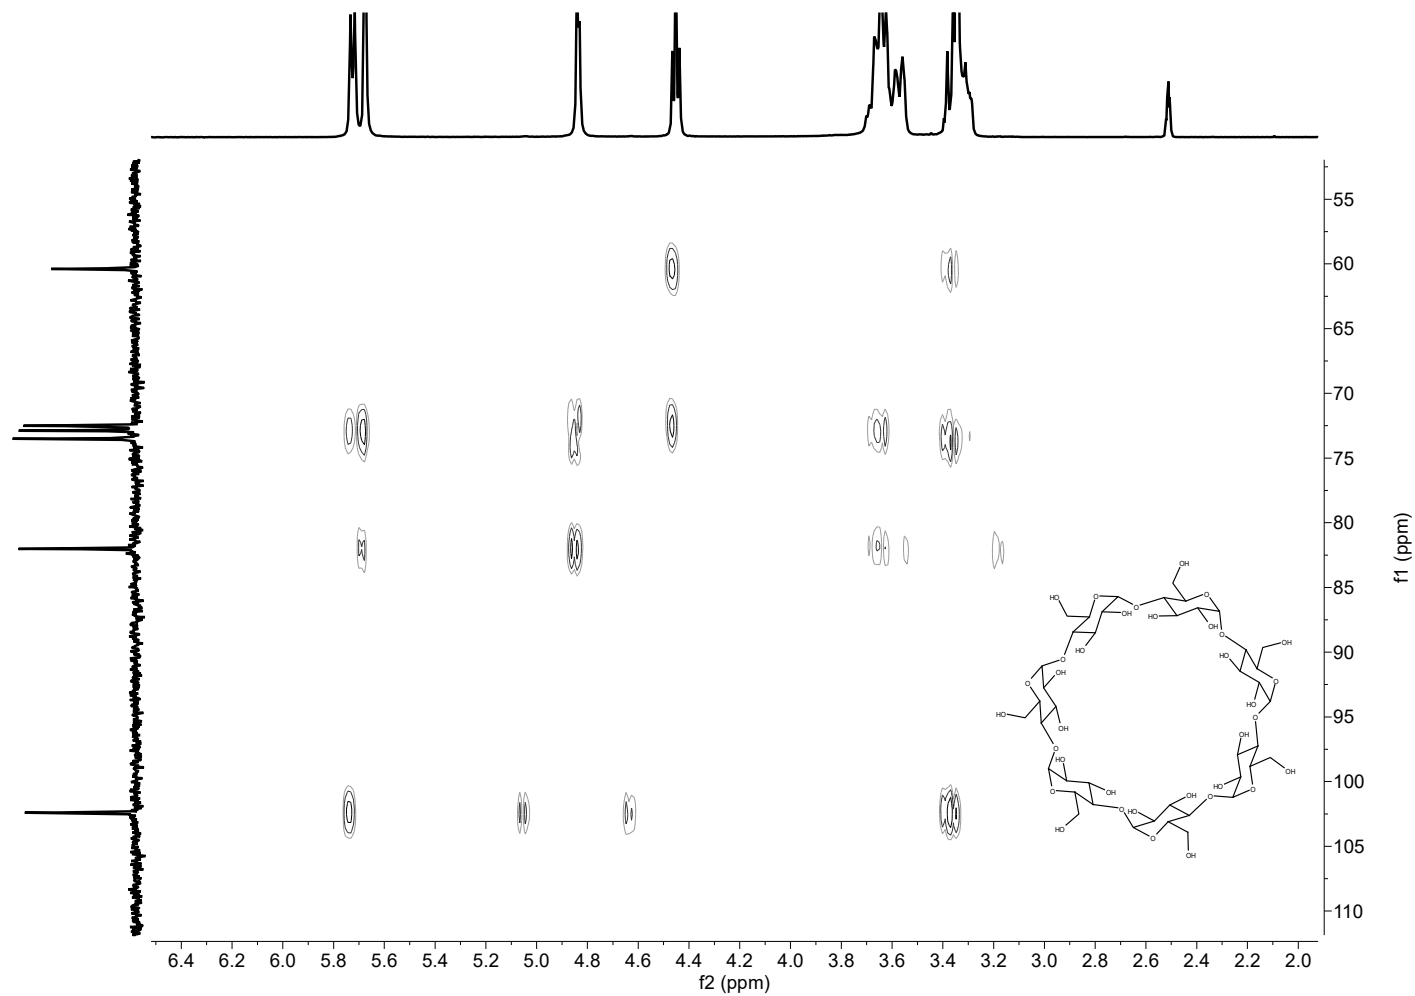

**Fig S31.** HMBC NMR spectrum of BCD (500 MHz, DMSO- $d_6$ ).

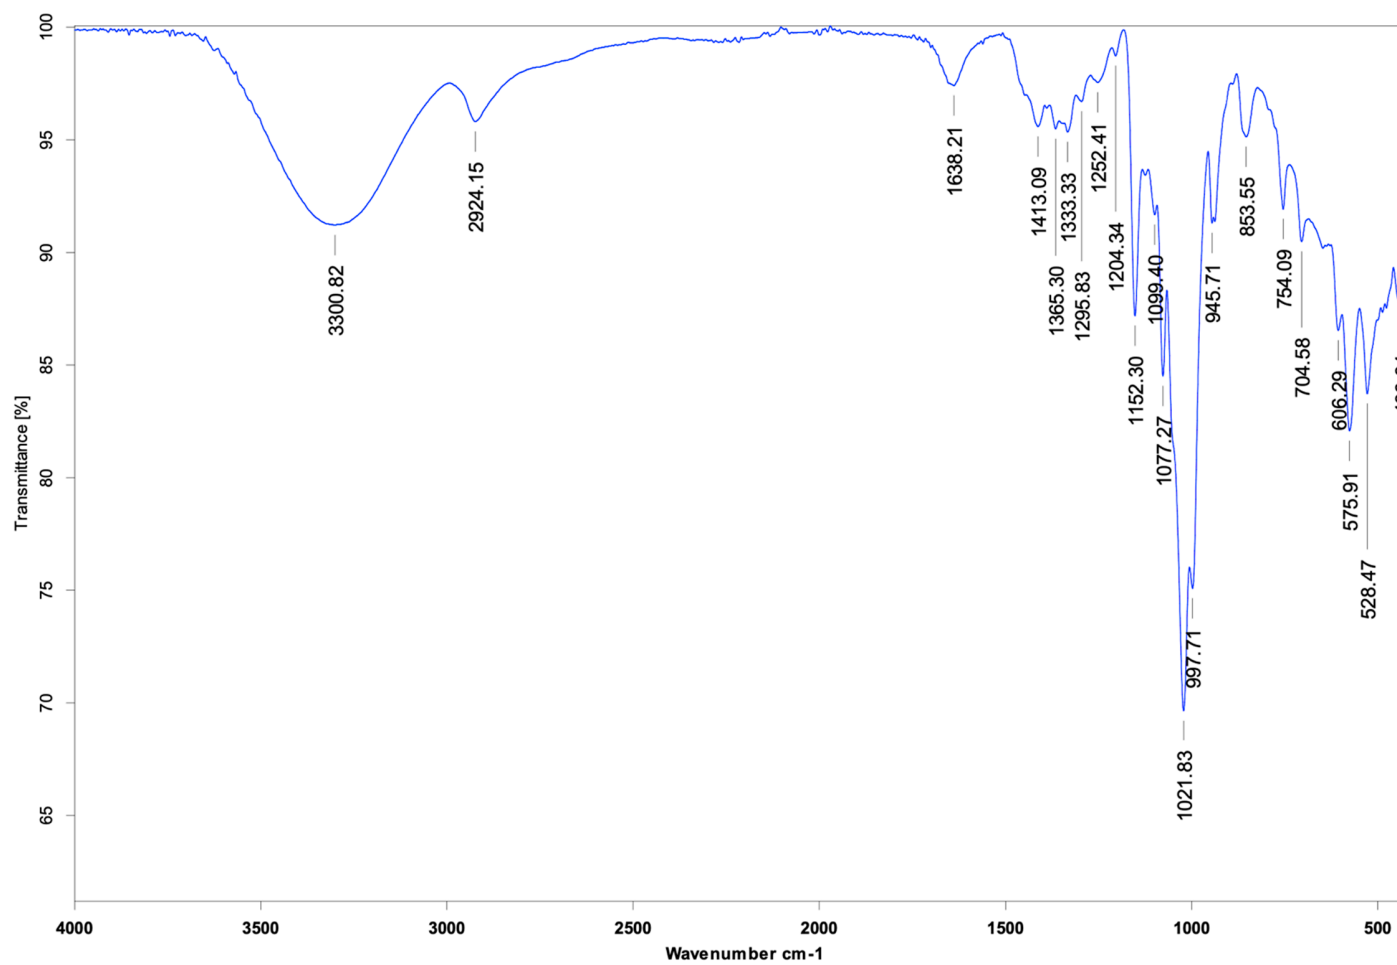

**Fig S32.** IR Spectrum of BCD.
